# Supplementary material for: Delirium Post-Stroke: Short- and Long-Term Effect on Depression, Anxiety, Apathy and Aggression (Research Study—Part of PROPOLIS Study)
Source: PubMed Central journal article supplement (PMC7408940; doi:10.3390/jcm9072232), 2020-07-14
Supplement: jcm-09-02232-s001.pdf [file jcm-09-02232-s001.pdf]

**Table S1.** Prevalence of depression, apathy, anxiety and aggression/hostility in hospital, at 3-month follow-up and 12-month follow-up in no-delirium and delirium groups

| Variable                       | No delirium |            | Delirium |                | P-value          |
|--------------------------------|-------------|------------|----------|----------------|------------------|
|                                | Data        | Score *    | Data     | Score *        |                  |
| <b>Depression</b>              |             |            |          |                |                  |
| PHQ-9 in hospital              | 384         | 4 (2-8)    | 73       | 7 (4-10)       | <b>0.002</b>     |
| PHQ-9 at 3m                    | 294         | 5 (2-9)    | 46       | 8 (4-12)       | <b>0.006</b>     |
| PHQ-9 at 12m                   | 212         | 5 (2-8)    | 22       | 4.5 (2-9)      | 0.771            |
| <b>Apathy</b>                  |             |            |          |                |                  |
| AES in hospital                | 360         | 28 (21-37) | 61       | 39 (34-47)     | <b>&lt;0.001</b> |
| AES at 3m                      | 294         | 28 (22-40) | 43       | 45 (32-57)     | <b>&lt;0.001</b> |
| AES at 12m                     | 209         | 27 (22-35) | 22       | 41.5 (27-55)   | <b>&lt;0.001</b> |
| <b>Anxiety</b>                 |             |            |          |                |                  |
| STAI-S in hospital             | 388         | 35 (28-44) | 84       | 40.5 (31-48.5) | <b>0.003</b>     |
| STAI-S at 3m                   | 294         | 34 (26-43) | 51       | 43 (31-50)     | <b>0.002</b>     |
| STAI-S at 12m                  | 199         | 30 (26-37) | 26       | 35 (39-44)     | 0.052            |
| <b>Aggression/hostility</b>    |             |            |          |                |                  |
| BDHI in hospital               | 368         | 48 (36-68) | 73       | 60 (46-80)     | <b>&lt;0.001</b> |
| 'Aggression' in hospital       | 368         | 30 (22-42) | 73       | 36 (28-48)     | <b>0.001</b>     |
| 'Hostility' in hospital        | 368         | 14 (8-22)  | 73       | 20 (16-26)     | <b>&lt;0.001</b> |
| Assault in hospital            | 368         | 6 (2-8)    | 73       | 8 (4-12)       | <b>0.002</b>     |
| Indirect hostility in hospital | 368         | 6 (4-10)   | 73       | 8 (4-12)       | 0.954            |
| Irritability in hospital       | 368         | 6 (4-10)   | 73       | 10 (6-10)      | <b>&lt;0.001</b> |
| Negativism in hospital         | 368         | 4 (2-6)    | 73       | 6 (2-8)        | <b>&lt;0.001</b> |
| Resentment in hospital         | 368         | 4 (2-8)    | 73       | 8 (6-12)       | <b>&lt;0.001</b> |
| Suspicion in hospital          | 368         | 10 (6-14)  | 73       | 12 (8-14)      | <b>0.001</b>     |
| Verbal hostility in hospital   | 368         | 12 (8-16)  | 73       | 14 (10-18)     | <b>0.008</b>     |
| Guilt in hospital              | 368         | 8.5 (6-14) | 73       | 14 (10-16)     | <b>&lt;0.001</b> |
| <b>3-month follow-up</b>       |             |            |          |                |                  |
| BDHI at 3m                     | 297         | 42 (30-57) | 49       | 48 (26-72)     | 0.244            |
| 'Aggression' at 3m             | 297         | 29 (20-38) | 49       | 32 (18-42)     | 0.474            |
| 'Hostility' at 3m              | 297         | 10 (6-15)  | 49       | 12 (7-19)      | 0.076            |
| Assault at 3m                  | 297         | 4 (2-7)    | 49       | 4 (2-8)        | 0.642            |
| Indirect hostility at 3m       | 297         | 6 (4-10)   | 49       | 7 (6-10)       | 0.729            |
| Irritability at 3m             | 297         | 8 (4-11)   | 49       | 10 (4-14)      | 0.052            |
| Negativism at 3m               | 297         | 2 (0-4)    | 49       | 2 (0-6)        | 0.741            |
| Resentment at 3m               | 297         | 4 (2-8)    | 49       | 6 (4-8)        | <b>0.012</b>     |
| Suspicion at 3m                | 297         | 5 (3-10)   | 49       | 6 (4-10)       | 0.329            |
| Verbal hostility at 3m         | 297         | 10 (6-14)  | 49       | 8 (4-16)       | 0.546            |
| Guilt at 3m                    | 297         | 8 (5-10)   | 49       | 9 (6-12)       | 0.220            |
| <b>12-month follow-up</b>      |             |            |          |                |                  |
| BDHI at 12m                    | 187         | 44 (32-58) | 20       | 38 (27-63.5)   | 0.635            |
| 'Aggression' at 12m            | 187         | 29 (20-39) | 20       | 21.5 (14.5-37) | 0.322            |
| 'Hostility' at 12m             | 187         | 12 (6-16)  | 20       | 10.5 (9.5-16)  | 0.416            |
| Assault at 12m                 | 187         | 4 (2-6)    | 20       | 3 (2-7)        | 0.987            |
| Indirect hostility at 12m      | 187         | 6 (4-9)    | 20       | 4 (2-8)        | 0.119            |
| Irritability at 12m            | 187         | 8 (4-11)   | 20       | 8 (6-13)       | 0.128            |
| Negativism at 12m              | 187         | 3 (2-4)    | 20       | 2 (0-4)        | 0.299            |
| Resentment at 12m              | 187         | 4 (2-8)    | 20       | 8 (4-10)       | <b>0.021</b>     |
| Suspicion at 12m               | 187         | 6 (4-10)   | 20       | 5.5 (2.5-9)    | 0.457            |
| Verbal hostility at 12m        | 187         | 10 (6-15)  | 20       | 7.5 (4-13)     | 0.101            |
| Guilt at 12m                   | 187         | 8 (6-10)   | 20       | 7 (5.5-9.5)    | 0.608            |

\* presented as median (IQR)

PHQ-9 – Patient Health Questionnaire-9; AES – Apathy Evaluation Scale; STAI-S – State-Trait Anxiety Inventory, state scale; BDHI – Buss-Durkee Hostility Inventory; 'Aggression' – assault, indirect hostility, irritability and verbal hostility; 'Hostility' – resentment and suspicion; at 3m – at 3-month follow-up; at 12m – at 12-month follow-up

**Table S2.** Influence of post-stroke delirium on the incidence of depression in hospital, at 3-month follow-up and 12-month follow-up in univariate and multivariate logistic regression models

| Variable                     | Incidence * of depression |                | Univariate logistic regression model |                    |                  | Multivariate logistic regression model |                    |              |
|------------------------------|---------------------------|----------------|--------------------------------------|--------------------|------------------|----------------------------------------|--------------------|--------------|
|                              | No delirium               | Delirium       | OR                                   | 95%CI              | P-value          | OR                                     | 95%CI              | P-value      |
| <i>In hospital</i>           |                           |                |                                      |                    |                  |                                        |                    |              |
| PHQ-9 score ≥5               | 181/384 (47.14%)          | 53/73 (72.60%) | <b>2.972</b>                         | <b>1.711-5.162</b> | <b>&lt;0.001</b> | <b>2.286</b>                           | <b>1.158-4.513</b> | <b>0.017</b> |
| PHQ-9 score ≥10              | 80/384 (20.83%)           | 20/73 (27.40%) | 1.434                                | 0.811-2.536        | 0.215            | ns                                     | ns                 | ns           |
| PHQ-9 score ≥15              | 24/384 (6.25%)            | 1/73 (1.37%)   | 0.208                                | 0.028-1.565        | 0.127            | ns                                     | ns                 | ns           |
| PHQ-9 score ≥20              | 3/384 (0.78%)             | 0/73 (0%)      | -                                    | -                  | -                | -                                      | -                  | -            |
| <i>At 3-month follow-up</i>  |                           |                |                                      |                    |                  |                                        |                    |              |
| PHQ-9 score ≥5               | 157/294 (53.40%)          | 34/46 (73.91%) | <b>2.472</b>                         | <b>1.232-4.963</b> | <b>0.011</b>     | ns                                     | ns                 | ns           |
| PHQ-9 score ≥10              | 70/294 (23.81%)           | 19/46 (41.30%) | <b>2.252</b>                         | <b>1.181-4.294</b> | <b>0.014</b>     | ns                                     | ns                 | ns           |
| PHQ-9 score ≥15              | 29/294 (9.86%)            | 9/46 (19.57%)  | 2.223                                | 0.976-5.063        | 0.057            | ns                                     | ns                 | ns           |
| PHQ-9 score ≥20              | 6/294 (2.04%)             | 3/46 (6.52%)   | 3.349                                | 0.807-13.889       | 0.096            | ns                                     | ns                 | ns           |
| <i>At 12-month follow-up</i> |                           |                |                                      |                    |                  |                                        |                    |              |
| PHQ-9 score ≥5               | 111/212 (52.36%)          | 11/22 (50.00%) | 0.910                                | 0.378-2.190        | 0.833            | ns                                     | ns                 | ns           |
| PHQ-9 score ≥10              | 43/212 (20.28%)           | 5/22 (22.73%)  | 1.156                                | 0.404-3.309        | 0.787            | ns                                     | ns                 | ns           |
| PHQ-9 score ≥15              | 9/212 (4.25%)             | 3/22 (13.64%)  | 3.561                                | 0.888-14.280       | 0.073            | ns                                     | ns                 | ns           |
| PHQ-9 score ≥20              | 1/212 (0.47%)             | 0/22 (0%)      | -                                    | -                  | -                | -                                      | -                  | -            |

\* presented as n (%)

PHQ-9 – Patient Health Questionnaire-9; ns – not significant

**Table S3.** Influence of post-stroke delirium on the incidence of apathy in hospital, at 3-month follow-up and 12-month follow-up in univariate and multivariate logistic regression models

| Variable                     | Incidence * of apathy |                | Univariate logistic regression model |                     |                  | Multivariate logistic regression model |                     |                  |
|------------------------------|-----------------------|----------------|--------------------------------------|---------------------|------------------|----------------------------------------|---------------------|------------------|
|                              | No delirium           | Delirium       | OR                                   | 95%CI               | P-value          | OR                                     | 95%CI               | P-value          |
| <i>In hospital</i>           |                       |                |                                      |                     |                  |                                        |                     |                  |
| AES score $\geq 37$          | 92/360 (25.56%)       | 40/61 (65.57%) | <b>5.549</b>                         | <b>3.110-9.899</b>  | <b>&lt;0.001</b> | <b>4.828</b>                           | <b>2.225-10.477</b> | <b>&lt;0.001</b> |
| <i>At 3-month follow-up</i>  |                       |                |                                      |                     |                  |                                        |                     |                  |
| AES score $\geq 37$          | 89/294 (30.27%)       | 28/43 (65.12%) | <b>4.300</b>                         | <b>2.190-8.442</b>  | <b>&lt;0.001</b> | <b>3.841</b>                           | <b>1.315-11.216</b> | <b>0.014</b>     |
| <i>At 12-month follow-up</i> |                       |                |                                      |                     |                  |                                        |                     |                  |
| AES score $\geq 37$          | 44/209 (21.05%)       | 13/22 (59.09%) | <b>5.417</b>                         | <b>2.175-13.493</b> | <b>&lt;0.001</b> | <b>4.951</b>                           | <b>1.685-14.547</b> | <b>0.004</b>     |

\* presented as n (%)

AES – Apathy Evaluation Scale

**Table S4.** Influence of post-stroke delirium on the incidence of anxiety in hospital, at 3-month follow-up and 12-month follow-up in univariate and multivariate logistic regression models

| Variable                      | Incidence * of anxiety |                | Univariate logistic regression model |                    |                  | Multivariate logistic regression model |                    |              |
|-------------------------------|------------------------|----------------|--------------------------------------|--------------------|------------------|----------------------------------------|--------------------|--------------|
|                               | No delirium            | Delirium       | OR                                   | 95%CI              | P-value          | OR                                     | 95%CI              | P-value      |
| <i>In hospital</i>            |                        |                |                                      |                    |                  |                                        |                    |              |
| STAI-S sten score of $\geq 7$ | 103/388 (26.55%)       | 34/84 (40.48%) | <b>1.882</b>                         | <b>1.152-3.073</b> | <b>0.012</b>     | ns                                     | ns                 | ns           |
| <i>At 3-month follow-up</i>   |                        |                |                                      |                    |                  |                                        |                    |              |
| STAI-S sten score of $\geq 7$ | 68/294 (23.13%)        | 35/51 (49.02%) | <b>3.196</b>                         | <b>1.732-5.895</b> | <b>&lt;0.001</b> | <b>2.831</b>                           | <b>1.254-6.391</b> | <b>0.012</b> |
| <i>At 12-month follow-up</i>  |                        |                |                                      |                    |                  |                                        |                    |              |
| STAI-S sten score of $\geq 7$ | 31/199 (15.58%)        | 7/26 (26.92%)  | 1.997                                | 0.774-5.150        | 0.153            | ns                                     | ns                 | ns           |

\* presented as n (%)

STAI-S – State-Trait Anxiety Inventory, state scale; ns – not significant

**Table S5.** Influence of post-stroke delirium on the incidence of aggression/hostility in hospital, at 3-month follow-up and 12-month follow-up in univariate and multivariate logistic regression models

| Variable                            | Incidence * of aggression/hostility |                | Univariate logistic regression model |                    |                  | Multivariate logistic regression model |                     |              |
|-------------------------------------|-------------------------------------|----------------|--------------------------------------|--------------------|------------------|----------------------------------------|---------------------|--------------|
|                                     | No delirium                         | Delirium       | OR                                   | 95%CI              | P-value          | OR                                     | 95%CI               | P-value      |
| <i>In hospital</i>                  |                                     |                |                                      |                    |                  |                                        |                     |              |
| 'Aggression' sten score of ≥7       | 27/368 (7.34%)                      | 11/73 (15.07%) | <b>2.241</b>                         | <b>1.057-4.751</b> | <b>0.035</b>     | <b>3.391</b>                           | <b>1.486-7.739</b>  | <b>0.004</b> |
| 'Hostility' sten score of ≥7        | 158/368 (42.93%)                    | 55/73 (75.34%) | <b>4.061</b>                         | <b>2.295-7.187</b> | <b>&lt;0.001</b> | ns                                     | ns                  | ns           |
| Assault sten score of ≥7            | 79/368 (21.47%)                     | 35/73 (47.95%) | <b>3.369</b>                         | <b>1.999-5.680</b> | <b>&lt;0.001</b> | <b>2.545</b>                           | <b>1.176-5.508</b>  | <b>0.018</b> |
| Indirect hostility sten score of ≥7 | 105/368 (28.53%)                    | 21/73 (28.77%) | 1.012                                | 0.581-1.762        | 0.968            | ns                                     | ns                  | ns           |
| Irritability sten score of ≥7       | 14/368 (3.80%)                      | 1/73 (1.37%)   | 0.351                                | 0.045-2.713        | 0.316            | ns                                     | ns                  | ns           |
| Negativism sten score of ≥7         | 135/368 (36.68%)                    | 42/73 (57.53%) | <b>2.338</b>                         | <b>1.404-3.895</b> | <b>0.001</b>     | <b>1.861</b>                           | <b>1.067-3.244</b>  | <b>0.029</b> |
| Resentment sten score of ≥7         | 124/368 (33.70%)                    | 45/73 (61.64%) | <b>3.162</b>                         | <b>1.882-5.314</b> | <b>&lt;0.001</b> | ns                                     | ns                  | ns           |
| Suspicion sten score of ≥7          | 219/368 (59.51%)                    | 58/73 (79.45%) | <b>2.631</b>                         | <b>1.437-4.816</b> | <b>0.002</b>     | ns                                     | ns                  | ns           |
| Verbal hostility sten score of ≥7   | 80/368 (21.74%)                     | 30/73 (41.10%) | <b>2.512</b>                         | <b>1.481-4.258</b> | <b>&lt;0.001</b> | <b>2.774</b>                           | <b>1.518-5.068</b>  | <b>0.001</b> |
| Guilt sten score of ≥7              | 139/368 (37.77%)                    | 44/73 (60.27%) | <b>2.500</b>                         | <b>1.495-4.179</b> | <b>&lt;0.001</b> | <b>1.876</b>                           | <b>1.024-3.438</b>  | <b>0.042</b> |
| <i>At 3-month follow-up</i>         |                                     |                |                                      |                    |                  |                                        |                     |              |
| 'Aggression' sten score of ≥7       | 29/297 (9.76%)                      | 6/49 (12.24%)  | 1.289                                | 0.506-3.288        | 0.595            | ns                                     | ns                  | ns           |
| 'Hostility' sten score of ≥7        | 58/297 (19.53%)                     | 16/49 (32.65%) | <b>1.998</b>                         | <b>1.030-3.875</b> | <b>0.041</b>     | ns                                     | ns                  | ns           |
| Assault sten score of ≥7            | 35/297 (11.78%)                     | 9/49 (18.37%)  | 1.684                                | 0.753-3.766        | 0.204            | ns                                     | ns                  | ns           |
| Indirect hostility sten score of ≥7 | 98/297 (33.00%)                     | 17/49 (34.69%) | 1.079                                | 0.571-2.038        | 0.815            | ns                                     | ns                  | ns           |
| Irritability sten score of ≥7       | 26/297 (8.75%)                      | 8/49 (16.33%)  | 2.034                                | 0.863-4.796        | 0.105            | ns                                     | ns                  | ns           |
| Negativism sten score of ≥7         | 67/297 (22.56%)                     | 14/49 (28.57%) | 1.373                                | 0.698-2.702        | 0.359            | ns                                     | ns                  | ns           |
| Resentment sten score of ≥7         | 83/297 (27.95%)                     | 18/49 (36.73%) | 1.497                                | 0.794-2.821        | 0.212            | ns                                     | ns                  | ns           |
| Suspicion sten score of ≥7          | 92/297 (30.98%)                     | 17/49 (34.69%) | 1.184                                | 0.626-2.240        | 0.604            | ns                                     | ns                  | ns           |
| Verbal hostility sten score of ≥7   | 47/297 (15.82%)                     | 11/49 (22.45%) | 1.540                                | 0.735-3.227        | 0.253            | ns                                     | ns                  | ns           |
| Guilt sten score of ≥7              | 69/297 (23.23%)                     | 16/49 (32.65%) | 1.602                                | 0.832-3.084        | 0.158            | ns                                     | ns                  | ns           |
| <i>At 12-month follow-up</i>        |                                     |                |                                      |                    |                  |                                        |                     |              |
| 'Aggression' sten score of ≥7       | 13/187 (6.95%)                      | 2/20 (10.00%)  | 1.487                                | 0.311-7.119        | 0.619            | ns                                     | ns                  | ns           |
| 'Hostility' sten score of ≥7        | 40/187 (21.39%)                     | 4/20 (20.00%)  | 0.919                                | 0.291-2.902        | 0.885            | ns                                     | ns                  | ns           |
| Assault sten score of ≥7            | 17/187 (9.09%)                      | 4/20 (20.00%)  | 2.500                                | 0.750-8.332        | 0.136            | ns                                     | ns                  | ns           |
| Indirect hostility sten score of ≥7 | 46/187 (24.60%)                     | 3/20 (15.00%)  | 0.541                                | 0.152-1.929        | 0.344            | ns                                     | ns                  | ns           |
| Irritability sten score of ≥7       | 17/187 (9.09%)                      | 4/20 (20.00%)  | 2.500                                | 0.750-8.332        | 0.136            | ns                                     | ns                  | ns           |
| Negativism sten score of ≥7         | 29/187 (20.86%)                     | 3/20 (15.00%)  | 0.670                                | 0.187-2.402        | 0.538            | ns                                     | ns                  | ns           |
| Resentment sten score of ≥7         | 57/187 (30.48%)                     | 12/20 (60.00%) | <b>3.421</b>                         | <b>1.327-8.822</b> | <b>0.011</b>     | <b>3.857</b>                           | <b>1.314-11.322</b> | <b>0.014</b> |
| Suspicion sten score of ≥7          | 58/187 (31.02%)                     | 5/20 (25.00%)  | 0.741                                | 0.257-2.137        | 0.580            | ns                                     | ns                  | ns           |
| Verbal hostility sten score of ≥7   | 35/187 (18.72%)                     | 2/20 (10.00%)  | 0.483                                | 0.107-2.176        | 0.343            | ns                                     | ns                  | ns           |
| Guilt sten score of ≥7              | 36/187 (19.25%)                     | 2/20 (10.00%)  | 0.466                                | 0.103-2.100        | 0.320            | ns                                     | ns                  | ns           |

\* presented as n (%)

'Aggression' – assault, indirect hostility, irritability and verbal hostility;

'Hostility' – resentment and suspicion; ns – not significant

**Table S6.** Influence of post-stroke delirium on the incidence of depression, apathy, anxiety and aggression/hostility in hospital, at 3-month follow-up and 12-month follow-up in univariate and multivariate logistic regression models

| Variable                            | Incidence *      |                | Univariate logistic regression model |                     |                  | Multivariate logistic regression model |                     |                  |
|-------------------------------------|------------------|----------------|--------------------------------------|---------------------|------------------|----------------------------------------|---------------------|------------------|
|                                     | No delirium      | Delirium       | OR                                   | 95%CI               | P-value          | OR                                     | 95%CI               | P-value          |
| <b>Depression</b>                   |                  |                |                                      |                     |                  |                                        |                     |                  |
| <i>In hospital</i>                  |                  |                |                                      |                     |                  |                                        |                     |                  |
| PHQ-9 score $\geq 5$                | 181/384 (47.14%) | 53/73 (72.60%) | <b>2.972</b>                         | <b>1.711-5.162</b>  | <b>&lt;0.001</b> | <b>2.286</b>                           | <b>1.158-4.513</b>  | <b>0.017</b>     |
| PHQ-9 score $\geq 10$               | 80/384 (20.83%)  | 20/73 (27.40%) | 1.434                                | 0.811-2.536         | 0.215            | ns                                     | ns                  | ns               |
| PHQ-9 score $\geq 15$               | 24/384 (6.25%)   | 1/73 (1.37%)   | 0.208                                | 0.028-1.565         | 0.127            | ns                                     | ns                  | ns               |
| PHQ-9 score $\geq 20$               | 3/384 (0.78%)    | 0/73 (0%)      | -                                    | -                   | -                | -                                      | -                   | -                |
| <i>At 3-month follow-up</i>         |                  |                |                                      |                     |                  |                                        |                     |                  |
| PHQ-9 score $\geq 5$                | 157/294 (53.40%) | 34/46 (73.91%) | <b>2.472</b>                         | <b>1.232-4.963</b>  | <b>0.011</b>     | ns                                     | ns                  | ns               |
| PHQ-9 score $\geq 10$               | 70/294 (23.81%)  | 19/46 (41.30%) | <b>2.252</b>                         | <b>1.181-4.294</b>  | <b>0.014</b>     | ns                                     | ns                  | ns               |
| PHQ-9 score $\geq 15$               | 29/294 (9.86%)   | 9/46 (19.57%)  | 2.223                                | 0.976-5.063         | 0.057            | ns                                     | ns                  | ns               |
| PHQ-9 score $\geq 20$               | 6/294 (2.04%)    | 3/46 (6.52%)   | 3.349                                | 0.807-13.889        | 0.096            | ns                                     | ns                  | ns               |
| <i>At 12-month follow-up</i>        |                  |                |                                      |                     |                  |                                        |                     |                  |
| PHQ-9 score $\geq 5$                | 111/212 (52.36%) | 11/22 (50.00%) | 0.910                                | 0.378-2.190         | 0.833            | ns                                     | ns                  | ns               |
| PHQ-9 score $\geq 10$               | 43/212 (20.28%)  | 5/22 (22.73%)  | 1.156                                | 0.404-3.309         | 0.787            | ns                                     | ns                  | ns               |
| PHQ-9 score $\geq 15$               | 9/212 (4.25%)    | 3/22 (13.64%)  | 3.561                                | 0.888-14.280        | 0.073            | ns                                     | ns                  | ns               |
| PHQ-9 score $\geq 20$               | 1/212 (0.47%)    | 0/22 (0%)      | -                                    | -                   | -                | -                                      | -                   | -                |
| <b>Apathy</b>                       |                  |                |                                      |                     |                  |                                        |                     |                  |
| <i>In hospital</i>                  |                  |                |                                      |                     |                  |                                        |                     |                  |
| AES score $\geq 37$                 | 92/360 (25.56%)  | 40/61 (65.57%) | <b>5.549</b>                         | <b>3.110-9.899</b>  | <b>&lt;0.001</b> | <b>4.828</b>                           | <b>2.225-10.477</b> | <b>&lt;0.001</b> |
| <i>At 3-month follow-up</i>         |                  |                |                                      |                     |                  |                                        |                     |                  |
| AES score $\geq 37$                 | 89/294 (30.27%)  | 28/43 (65.12%) | <b>4.300</b>                         | <b>2.190-8.442</b>  | <b>&lt;0.001</b> | <b>3.841</b>                           | <b>1.315-11.216</b> | <b>0.014</b>     |
| <i>At 12-month follow-up</i>        |                  |                |                                      |                     |                  |                                        |                     |                  |
| AES score $\geq 37$                 | 44/209 (21.05%)  | 13/22 (59.09%) | <b>5.417</b>                         | <b>2.175-13.493</b> | <b>&lt;0.001</b> | <b>4.951</b>                           | <b>1.685-14.547</b> | <b>0.004</b>     |
| <b>Anxiety</b>                      |                  |                |                                      |                     |                  |                                        |                     |                  |
| <i>In hospital</i>                  |                  |                |                                      |                     |                  |                                        |                     |                  |
| STAI-S sten score of $\geq 7$       | 103/388 (26.55%) | 34/84 (40.48%) | <b>1.882</b>                         | <b>1.152-3.073</b>  | <b>0.012</b>     | ns                                     | ns                  | ns               |
| <i>At 3-month follow-up</i>         |                  |                |                                      |                     |                  |                                        |                     |                  |
| STAI-S sten score of $\geq 7$       | 68/294 (23.13%)  | 35/51 (68.63%) | <b>3.196</b>                         | <b>1.732-5.895</b>  | <b>&lt;0.001</b> | <b>2.831</b>                           | <b>1.254-6.391</b>  | <b>0.012</b>     |
| <i>At 12-month follow-up</i>        |                  |                |                                      |                     |                  |                                        |                     |                  |
| STAI-S sten score of $\geq 7$       | 31/199 (15.58%)  | 7/26 (26.92%)  | 1.997                                | 0.774-5.150         | 0.153            | ns                                     | ns                  | ns               |
| <b>Aggression/hostility</b>         |                  |                |                                      |                     |                  |                                        |                     |                  |
| <i>In hospital</i>                  |                  |                |                                      |                     |                  |                                        |                     |                  |
| 'Aggression' sten score of $\geq 7$ | 27/368 (7.34%)   | 11/73 (15.07%) | <b>2.241</b>                         | <b>1.057-4.751</b>  | <b>0.035</b>     | <b>3.391</b>                           | <b>1.486-7.739</b>  | <b>0.004</b>     |
| 'Hostility' sten score of $\geq 7$  | 158/368 (42.93%) | 55/73 (75.34%) | <b>4.061</b>                         | <b>2.295-7.187</b>  | <b>&lt;0.001</b> | ns                                     | ns                  | ns               |
| <i>At 3-month follow-up</i>         |                  |                |                                      |                     |                  |                                        |                     |                  |
| 'Aggression' sten score of $\geq 7$ | 29/297 (9.76%)   | 6/49 (12.24%)  | 1.289                                | 0.506-3.288         | 0.595            | ns                                     | ns                  | ns               |
| 'Hostility' sten score of $\geq 7$  | 58/297 (19.53%)  | 16/49 (32.65%) | <b>1.998</b>                         | <b>1.030-3.875</b>  | <b>0.041</b>     | ns                                     | ns                  | ns               |
| <i>At 12-month follow-up</i>        |                  |                |                                      |                     |                  |                                        |                     |                  |
| 'Aggression' sten score of $\geq 7$ | 13/187 (6.95%)   | 2/20 (10.00%)  | 1.487                                | 0.311-7.119         | 0.619            | ns                                     | ns                  | ns               |
| 'Hostility' sten score of $\geq 7$  | 40/187 (21.39%)  | 4/20 (20.00%)  | 0.919                                | 0.291-2.902         | 0.885            | ns                                     | ns                  | ns               |

\* presented as n (%)

PHQ-9 – Patient Health Questionnaire-9; AES – Apathy Evaluation Scale; STAI-S – State-Trait Anxiety Inventory, state scale;

'Aggression' – assault, indirect hostility, irritability and verbal hostility; 'Hostility' – resentment and suspicion;

ns – not significant

**Table S7.** Predictors of post-stroke depression (PHQ-9 score  $\geq 5$ ) in hospital in univariate and multivariate logistic regression models

| Variable                         | Data | No depression          | Depression             | Univariate logistic regression model |                    |                  | Multivariate logistic regression model |                     |                  |
|----------------------------------|------|------------------------|------------------------|--------------------------------------|--------------------|------------------|----------------------------------------|---------------------|------------------|
|                                  |      |                        |                        | OR                                   | 95%CI              | P-value          | OR                                     | 95%CI               | P-value          |
| Male gender *                    | 457  | 139/223 (62.33%)       | 104/234 (44.44%)       | <b>0.483</b>                         | <b>0.333-0.703</b> | <b>&lt;0.001</b> | <b>0.400</b>                           | <b>0.249-0.642</b>  | <b>&lt;0.001</b> |
| Age [years] **                   | 457  | 67 (30-78)             | 73 (62-80)             | <b>1.019</b>                         | <b>1.005-1.034</b> | <b>0.008</b>     | ns                                     | ns                  | ns               |
| BMI [kg/m <sup>2</sup> ] **      | 447  | 26.11<br>(23.64-29.68) | 27.34<br>(24.06-30.47) | 1.020                                | 0.981-1.061        | 0.315            | ns                                     | ns                  | ns               |
| Higher education *               | 451  | 47 (21.36%)            | 40/231 (17.32%)        | 0.771                                | 0.482-1.232        | 0.280            | ns                                     | ns                  | ns               |
| Education length [years] **      | 449  | 12 (10-14)             | 11 (9-13)              | 0.951                                | 0.899-1.006        | 0.081            | ns                                     | ns                  | ns               |
| Hemorrhagic stroke *             | 457  | 12/223 (5.38%)         | 12/234 (5.13%)         | 0.950                                | 0.418-2.162        | 0.904            | ns                                     | ns                  | ns               |
| TOAST classification             |      |                        |                        |                                      |                    |                  |                                        |                     |                  |
| - 1 *                            | 398  | 24/197 (12.18%)        | 22/201 (10.95%)        | 0.886                                | 0.479-1.639        | 0.700            | ns                                     | ns                  | ns               |
| - 2 *                            | 398  | 11/197 (5.58%)         | 11/201 (5.47%)         | 0.979                                | 0.414-2.313        | 0.961            | ns                                     | ns                  | ns               |
| - 3 *                            | 398  | 59/197 (29.95%)        | 65/201 (32.34%)        | 1.118                                | 0.731-1.709        | 0.607            | ns                                     | ns                  | ns               |
| - 4 *                            | 398  | 101 (51.27%)           | 101/201 (50.25%)       | 0.960                                | 0.648-1.422        | 0.839            | ns                                     | ns                  | ns               |
| - 5 *                            | 398  | 2/197 (1.02%)          | 2/201 (1.00%)          | 0.980                                | 0.137-7.026        | 0.984            | ns                                     | ns                  | ns               |
| Side of stroke                   |      |                        |                        |                                      |                    |                  |                                        |                     |                  |
| - right hemisphere *             | 457  | 88/223 (39.46%)        | 108/234 (46.15%)       | 1.315                                | 0.907-1.907        | 0.149            | ns                                     | ns                  | ns               |
| - left hemisphere *              | 457  | 102/223 (45.74%)       | 88/234 (37.61%)        | 0.715                                | 0.492-1.039        | 0.078            | ns                                     | ns                  | ns               |
| - posterior part *               | 457  | 31/223 (13.90%)        | 30/234 (12.82%)        | 0.911                                | 0.531-1.562        | 0.734            | ns                                     | ns                  | ns               |
| - multiple locations *           | 457  | 2/223 (0.90%)          | 8/23 (3.42%)           | 3.912                                | 0.821-18.625       | 0.087            | ns                                     | ns                  | ns               |
| rt-Pa treatment *                | 457  | 61/223 (27.35%)        | 41/234 (17.52%)        | <b>0.564</b>                         | <b>0.361-0.883</b> | <b>0.012</b>     | ns                                     | ns                  | ns               |
| Thrombectomy *                   | 457  | 11/223 (4.93%)         | 9/234 (3.85%)          | 0.771                                | 0.313-1.897        | 0.571            | ns                                     | ns                  | ns               |
| Medical history                  |      |                        |                        |                                      |                    |                  |                                        |                     |                  |
| - hypertension *                 | 457  | 148/223 (66.37%)       | 172/234 (73.50%)       | 1.406                                | 0.941-2.101        | 0.097            | ns                                     | ns                  | ns               |
| - diabetes *                     | 457  | 44/223 (19.73%)        | 76/234 (32.48%)        | <b>1.957</b>                         | <b>1.275-3.004</b> | <b>0.002</b>     | ns                                     | ns                  | ns               |
| - atrial fibrillation *          | 457  | 35/223 (15.70%)        | 44/234 (18.80%)        | 1.244                                | 0.764-2.026        | 0.380            | ns                                     | ns                  | ns               |
| - myocardial infraction *        | 457  | 32/223 (14.35%)        | 32/234 (13.68%)        | 0.946                                | 0.557-1.604        | 0.836            | ns                                     | ns                  | ns               |
| - PCI or CABG *                  | 457  | 22/223 (9.87%)         | 20/234 (8.55%)         | 0.854                                | 0.452-1.612        | 0.626            | ns                                     | ns                  | ns               |
| - smoking – ever *               | 456  | 112/222 (50.45%)       | 118/234 (50.43%)       | 0.999                                | 0.692-1.442        | 0.996            | ns                                     | ns                  | ns               |
| - smoking – current *            | 456  | 59/222 (26.58%)        | 66/234 (28.21%)        | 1.085                                | 0.719-1.639        | 0.697            | ns                                     | ns                  | ns               |
| - previous stroke or TIA *       | 455  | 30/222 (13.51%)        | 49/233 (21.03%)        | <b>1.704</b>                         | <b>1.037-2.803</b> | <b>0.036</b>     | ns                                     | ns                  | ns               |
| CIRS, total score **             | 457  | 7 (4-11)               | 9 (6-12)               | <b>1.097</b>                         | <b>1.051-1.146</b> | <b>&lt;0.001</b> | ns                                     | ns                  | ns               |
| Medicines                        |      |                        |                        |                                      |                    |                  |                                        |                     |                  |
| - anticholinergic risk scale *** | 419  | 0.02 ± 0.22            | 0.11 ± 0.69            | 1.771                                | 0.892-3.519        | 0.103            | ns                                     | ns                  | ns               |
| - antidepressants *              | 375  | 0/188 (0%)             | 3/187 (1.60%)          | -                                    | -                  | -                | -                                      | -                   | -                |
| - neuroleptics *                 | 375  | 2/188 (1.06%)          | 1/187 (0.53%)          | 0.500                                | 0.045-5.562        | 0.573            | ns                                     | ns                  | ns               |
| - benzodiazepines *              | 374  | 3/187 (1.60%)          | 4/187 (2.14%)          | 1.341                                | 0.296-6.074        | 0.704            | ns                                     | ns                  | ns               |
| Pneumonia *                      | 457  | 7/223 (3.14%)          | 21/234 (8.97%)         | <b>3.042</b>                         | <b>1.267-7.306</b> | <b>0.013</b>     | <b>3.360</b>                           | <b>1.005-11.237</b> | <b>0.049</b>     |
| Urinary tract infections *       | 442  | 52/218 (23.85%)        | 68/224 (30.36%)        | 1.392                                | 0.912-2.122        | 0.125            | ns                                     | ns                  | ns               |
| Hospital stay [days] **          | 457  | 9 (8-10)               | 9 (8-11)               | 1.033                                | 0.982-1.087        | 0.205            | ns                                     | ns                  | ns               |
| Aphasia in hospital *            | 457  | 48/223 (21.52%)        | 40/234 (17.09%)        | 0.752                                | 0.471-1.199        | 0.231            | ns                                     | ns                  | ns               |
| Neglect in hospital *            | 457  | 20/223 (8.97%)         | 28/234 (11.97%)        | 1.380                                | 0.752-2.528        | 0.298            | ns                                     | ns                  | ns               |
| Vision deficits in hospital *    | 457  | 53/223 (23.77%)        | 71/234 (30.34%)        | 1.397                                | 0.922-2.117        | 0.115            | ns                                     | ns                  | ns               |

|                            |     |                   |                   |              |                     |                  |              |                    |              |
|----------------------------|-----|-------------------|-------------------|--------------|---------------------|------------------|--------------|--------------------|--------------|
| NIHSS at admission **      | 457 | 4 (2-7)           | 4 (2-9)           | 1.008        | 0.974-1.044         | 0.641            | ns           | ns                 | ns           |
| Pre-hospital mRS **        | 457 | 0 (0-0)           | 0 (0-1)           | <b>1.488</b> | <b>1.189-1.863</b>  | <b>&lt;0.001</b> | <b>1.433</b> | <b>1.032-1.990</b> | <b>0.032</b> |
| CRP in hospital [mg/l] **  | 442 | 3.74 (1.59-10.77) | 5.44 (1.97-17.25) | <b>1.007</b> | <b>1.001-1.013</b>  | <b>0.030</b>     | ns           | ns                 | ns           |
| NPI, total score ***       | 374 | 2.57 ± 5.49       | 5.92 ± 11.15      | <b>1.061</b> | <b>1.025-1.099</b>  | <b>&lt;0.001</b> | <b>1.045</b> | <b>1.008-1.084</b> | <b>0.018</b> |
| - agitation/aggression *** | 374 | 1.23 ± 3.30       | 2.01 ± 5.80       | 1.039        | 0.989-1.091         | 0.129            | ns           | ns                 | ns           |
| - mood ***                 | 374 | 0.93 ± 2.79       | 1.28 ± 2.81       | 1.048        | 0.971-1.130         | 0.228            | ns           | ns                 | ns           |
| - frontal ***              | 374 | 1.07 ± 2.96       | 1.45 ± 3.47       | 1.038        | 0.972-1.108         | 0.264            | ns           | ns                 | ns           |
| - psychosis ***            | 374 | 0.10 ± 0.60       | 0.59 ± 2.80       | 1.245        | 0.987-1.569         | 0.064            | ns           | ns                 | ns           |
| Pre-hospital IQCODE **     | 377 | 78 (78-79)        | 78 (78-81)        | <b>1.058</b> | <b>1.020-1.097</b>  | <b>0.003</b>     | ns           | ns                 | ns           |
| Delirium in hospital *     | 457 | 20/223 (8.97%)    | 53/234 (22.65%)   | <b>2.972</b> | <b>1.711-5.162</b>  | <b>&lt;0.001</b> | <b>2.286</b> | <b>1.158-4.513</b> | <b>0.017</b> |
| Delirium type              |     |                   |                   |              |                     |                  |              |                    |              |
| - hyperactive *            | 457 | 4/223 (1.79%)     | 13/234 (5.56%)    | <b>3.221</b> | <b>1.034-10.031</b> | <b>0.044</b>     | ns           | ns                 | ns           |
| - hypoactive *             | 457 | 5/223 (2.24%)     | 23/234 (9.83%)    | <b>4.753</b> | <b>1.774-12.733</b> | <b>0.002</b>     | ns           | ns                 | ns           |
| - mixed *                  | 457 | 6/223 (2.69%)     | 14/234 (5.98%)    | 2.302        | 0.868-6.099         | 0.094            | ns           | ns                 | ns           |
| Delirium length [days] **  | 73  | 3 (1-6.5)         | 2 (1-5)           | 0.920        | 0.736-1.149         | 0.461            | ns           | ns                 | ns           |

\* n (%); \*\* median (IQR); \*\*\* mean ± SD; PHQ-9 – Patient Health Questionnaire-9; BMI – body mass index; TOAST – Trial of Org 10172 in Acute Stroke Treatment; rt-Pa – recombinant tissue plasminogen activator; PCI – percutaneous coronary interventions; CABG – coronary artery bypass graft; TIA – transient ischemic attack; CIRS – Cumulative Illness Rating Scale; NIHSS – National Institutes of Health Stroke Scale; mRS – Modified Rankin Scale; CRP – C-reactive protein; NPI – Neuropsychiatric Inventory; IQCODE - Informant Questionnaire on Cognitive Decline in the Elderly; ns – not significant



**Table S8.** Predictors of post-stroke apathy (AES score  $\geq 37$ ) in hospital in univariate and multivariate logistic regression models

| Variable                         | Data | No apathy              | Apathy                 | Univariate logistic regression model |                    |                  | Multivariate logistic regression model |                    |              |
|----------------------------------|------|------------------------|------------------------|--------------------------------------|--------------------|------------------|----------------------------------------|--------------------|--------------|
|                                  |      |                        |                        | OR                                   | 95%CI              | P-value          | OR                                     | 95%CI              | P-value      |
| Male gender *                    | 421  | 142/289 (49.13%)       | 73/132 (55.30%)        | 1.281                                | 0.847-1.937        | 0.241            | ns                                     | ns                 | ns           |
| Age [years] **                   | 421  | 66 (59-77)             | 74.5 (64.5-81)         | <b>1.041</b>                         | <b>1.023-1.059</b> | <b>&lt;0.001</b> | ns                                     | ns                 | ns           |
| BMI [kg/m <sup>2</sup> ] **      | 413  | 26.54<br>(23.59-30.06) | 27.34<br>(24.69-31.02) | 1.032                                | 0.990-1.076        | 0.135            | ns                                     | ns                 | ns           |
| Higher education *               | 416  | 68/285 (23.86%)        | 14/131 (10.69%)        | <b>0.382</b>                         | <b>0.206-0.708</b> | <b>0.002</b>     | ns                                     | ns                 | ns           |
| Education length [years] **      | 414  | 7 (4-11)               | 10 (9-12)              | <b>0.874</b>                         | <b>0.816-0.937</b> | <b>&lt;0.001</b> | ns                                     | ns                 | ns           |
| Hemorrhagic stroke *             | 421  | 13/289 (4.50%)         | 9/132 (6.82%)          | 1.553                                | 0.647-3.731        | 0.324            | ns                                     | ns                 | ns           |
| TOAST classification             |      |                        |                        |                                      |                    |                  |                                        |                    |              |
| - 1 *                            | 371  | 23/257 (8.95%)         | 17/114 (14.91%)        | 1.783                                | 0.912-3.485        | 0.091            | ns                                     | ns                 | ns           |
| - 2 *                            | 371  | 15/257 (5.84%)         | 2/114 (1.75%)          | 0.288                                | 0.065-1.281        | 0.102            | ns                                     | ns                 | ns           |
| - 3 *                            | 371  | 70/257 (27.24%)        | 44/114 (38.60%)        | <b>1.679</b>                         | <b>1.053-2.677</b> | <b>0.029</b>     | ns                                     | ns                 | ns           |
| - 4 *                            | 371  | 146/257 (56.81%)       | 50/114 (43.86%)        | <b>0.594</b>                         | <b>0.381-0.927</b> | <b>0.022</b>     | ns                                     | ns                 | ns           |
| - 5 *                            | 371  | 3/257 (1.117%)         | 1/114 (0.88%)          | 0.749                                | 0.077-7.282        | 0.804            | ns                                     | ns                 | ns           |
| Side of stroke                   |      |                        |                        |                                      |                    |                  |                                        |                    |              |
| - right hemisphere *             | 421  | 125/289 (43.25%)       | 60/132 (45.45%)        | 1.093                                | 0.723-1.654        | 0.673            | ns                                     | ns                 | ns           |
| - left hemisphere *              | 421  | 117/289 (40.48%)       | 50/132 (37.88%)        | 0.896                                | 0.587-1.368        | 0.612            | ns                                     | ns                 | ns           |
| - posterior part *               | 421  | 41/289 (14.19%)        | 19/132 (14.39%)        | 1.017                                | 0.565-1.831        | 0.955            | ns                                     | ns                 | ns           |
| - multiple locations *           | 421  | 6/289 (2.08%)          | 3/132 (2.27%)          | 1.097                                | 0.270-4.455        | 0.897            | ns                                     | ns                 | ns           |
| rt-Pa treatment *                | 421  | 65/28 (22.49%)         | 34/132 (25.76%)        | 1.196                                | 0.741-1.928        | 0.464            | ns                                     | ns                 | ns           |
| Thrombectomy *                   | 421  | 11/289 (3.81%)         | 7/132 (5.30%)          | 1.415                                | 0.536-3.737        | 0.483            | ns                                     | ns                 | ns           |
| Medical history                  |      |                        |                        |                                      |                    |                  |                                        |                    |              |
| - hypertension *                 | 421  | 187/289 (64.71%)       | 98/132 (74.24%)        | 1.572                                | 0.994-2.487        | 0.053            | ns                                     | ns                 | ns           |
| - diabetes *                     | 421  | 52/289 (17.99%)        | 54/132 (40.91%)        | <b>3.155</b>                         | <b>1.994-4.992</b> | <b>&lt;0.001</b> | <b>2.927</b>                           | <b>1.563-5.479</b> | <b>0.001</b> |
| - atrial fibrillation *          | 421  | 40/289 (13.84%)        | 34/132 (25.76%)        | <b>2.160</b>                         | <b>1.292-3.609</b> | <b>0.003</b>     | ns                                     | ns                 | ns           |
| - myocardial infraction *        | 421  | 31/289 (10.73%)        | 22/32 (16.67%)         | 1.665                                | 0.922-3.003        | 0.091            | ns                                     | ns                 | ns           |
| - PCI or CABG *                  | 421  | 22/289 (7.61%)         | 14/132 (10.61%)        | 1.440                                | 0.712-2.912        | 0.310            | ns                                     | ns                 | ns           |
| - smoking – ever *               | 420  | 149/288 (51.74%)       | 69/132 (52.27%)        | 1.022                                | 0.676-1.543        | 0.919            | ns                                     | ns                 | ns           |
| - smoking – current *            | 420  | 79/288 (27.43%)        | 41/132 (31.06%)        | 1.192                                | 0.760-1.870        | 0.445            | ns                                     | ns                 | ns           |
| - previous stroke or TIA *       | 420  | 46/288 (15.97%)        | 26/132 (19.70%)        | 1.290                                | 0.758-2.197        | 0.348            | ns                                     | ns                 | ns           |
| CIRS, total score **             | 421  | 7 (4-11)               | 10 (6-12.5)            | <b>1.099</b>                         | <b>1.049-1.150</b> | <b>&lt;0.001</b> | ns                                     | ns                 | ns           |
| Medicines                        |      |                        |                        |                                      |                    |                  |                                        |                    |              |
| - anticholinergic risk scale *** | 382  | 0.01 $\pm$ 0.18        | 0.22 $\pm$ 0.87        | <b>2.806</b>                         | <b>1.244-6.330</b> | <b>0.013</b>     | ns                                     | ns                 | ns           |
| - antidepressants *              | 353  | 3/245 (1.22%)          | 5/108 (4.63%)          | 3.916                                | 0.919-16.691       | 0.065            | ns                                     | ns                 | ns           |
| - neuroleptics *                 | 353  | 2/245 (0.82%)          | 0/108 (0%)             | -                                    | -                  | -                | -                                      | -                  | -            |
| - benzodiazepines *              | 352  | 4/244 (1.64%)          | 2/108 (1.85%)          | 1.132                                | 0.204-6.276        | 0.887            | ns                                     | ns                 | ns           |
| Pneumonia *                      | 421  | 13/289 (4.50%)         | 9/132 (6.82%)          | 1.553                                | 0.647-3.731        | 0.324            | ns                                     | ns                 | ns           |
| Urinary tract infections *       | 409  | 69 (24.56%)            | 44/128 (34.38%)        | <b>1.609</b>                         | <b>1.021-2.536</b> | <b>0.040</b>     | ns                                     | ns                 | ns           |
| Hospital stay [days] **          | 421  | 9 (8-10)               | 9 (9-12.5)             | <b>1.058</b>                         | <b>1.002-1.116</b> | <b>0.043</b>     | ns                                     | ns                 | ns           |
| Aphasia in hospital *            | 421  | 50/289 (17.30%)        | 27/132 (20.45%)        | 1.229                                | 0.730-2.070        | 0.438            | ns                                     | ns                 | ns           |
| Neglect in hospital *            | 421  | 24/289 (8.30%)         | 19/132 (14.39%)        | 1.857                                | 0.978-3.524        | 0.059            | ns                                     | ns                 | ns           |
| Vision deficits in hospital *    | 421  | 60/289 (20.76%)        | 53/132 (40.15%)        | <b>2.561</b>                         | <b>1.634-4.013</b> | <b>&lt;0.001</b> | ns                                     | ns                 | ns           |

|                            |     |                   |                   |              |                     |                  |              |                     |                  |
|----------------------------|-----|-------------------|-------------------|--------------|---------------------|------------------|--------------|---------------------|------------------|
| NIHSS at admission **      | 421 | 4 (2-7)           | 5.5 (3-10)        | <b>1.054</b> | <b>1.014-1.095</b>  | <b>0.008</b>     | ns           | ns                  | ns               |
| Pre-hospital mRS **        | 421 | 0 (0-0)           | 0 (0-1)           | <b>1.435</b> | <b>1.160-1.775</b>  | <b>&lt;0.001</b> | ns           | ns                  | ns               |
| CRP in hospital [mg/l] **  | 407 | 3.54 (1.51-11.94) | 6.67 (2.50-13.63) | 1.003        | 0.998-1.009         | 0.260            | ns           | ns                  | ns               |
| NPI, total score ***       | 352 | 3.38 ± 6.94       | 6.74 ± 11.67      | <b>1.044</b> | <b>1.014-1.074</b>  | <b>0.003</b>     | ns           | ns                  | ns               |
| - agitation/aggression *** | 352 | 1.24 ± 3.40       | 2.48 ± 6.61       | <b>1.055</b> | <b>1.003-1.110</b>  | <b>0.037</b>     | ns           | ns                  | ns               |
| - mood ***                 | 352 | 1.21 ± 2.69       | 2.91 ± 5.22       | <b>1.121</b> | <b>1.054-1.192</b>  | <b>&lt;0.001</b> | <b>1.149</b> | <b>1.062-1.244</b>  | <b>0.001</b>     |
| - frontal ***              | 352 | 0.71 ± 1.74       | 1.85 ± 4.20       | <b>1.154</b> | <b>1.056-1.260</b>  | <b>0.002</b>     | ns           | ns                  | ns               |
| - psychosis ***            | 352 | 0.16 ± 1.47       | 0.46 ± 2.08       | 1.099        | 0.961-1.258         | 0.169            | ns           | ns                  | ns               |
| Pre-hospital IQCODE **     | 355 | 78 (78-79)        | 78 (78-84)        | <b>1.057</b> | <b>1.020-1.095</b>  | <b>0.002</b>     | ns           | ns                  | ns               |
| Delirium in hospital *     | 421 | 21/289 (7.27%)    | 40/132 (30.30%)   | <b>5.549</b> | <b>3.110-9.899</b>  | <b>&lt;0.001</b> | <b>4.828</b> | <b>2.225-10.477</b> | <b>&lt;0.001</b> |
| Delirium type              |     |                   |                   |              |                     |                  |              |                     |                  |
| - hyperactive *            | 421 | 3/289 (1.04%)     | 11/132 (8.33%)    | <b>8,667</b> | <b>2.376-31.617</b> | <b>0.001</b>     | ns           | ns                  | ns               |
| - hypoactive *             | 421 | 10/289 (3.46%)    | 15/132 (11.36%)   | <b>3.577</b> | <b>1.562-8.193</b>  | <b>0.003</b>     | ns           | ns                  | ns               |
| - mixed *                  | 421 | 5/289 (1.73%)     | 10/132 (7.58%)    | <b>4.656</b> | <b>1.559-13.907</b> | <b>0.006</b>     | ns           | ns                  | ns               |
| Delirium length [days] **  | 61  | 3 (1-5)           | 3 (1-6)           | 1.009        | 0.795-1.281         | 0.941            | ns           | ns                  | ns               |

\* n (%); \*\* median (IQR); \*\*\* mean ± SD; AES – Apathy Evaluation Scale; BMI – body mass index; TOAST – Trial of Org 10172 in Acute Stroke Treatment; rt-Pa – recombinant tissue plasminogen activator; PCI – percutaneous coronary interventions; CABG – coronary artery bypass graft; TIA – transient ischemic attack; CIRS – Cumulative Illness Rating Scale; NIHSS – National Institutes of Health Stroke Scale; mRS – Modified Rankin Scale; CRP – C-reactive protein; NPI – Neuropsychiatric Inventory; IQCODE - Informant Questionnaire on Cognitive Decline in the Elderly; ns – not significant

**Table S9.** Predictors of post-stroke apathy (AES score  $\geq 37$ ) at 3-month follow-up in univariate and multivariate logistic regression models

| Variable                         | Data | Univariate logistic regression model |                        |              |                    |                  | Multivariate logistic regression model |                    |                  |
|----------------------------------|------|--------------------------------------|------------------------|--------------|--------------------|------------------|----------------------------------------|--------------------|------------------|
|                                  |      | No apathy                            | Apathy                 | OR           | 95%CI              | P-value          | OR                                     | 95%CI              | P-value          |
| Male gender *                    | 337  | 119/220 (54.09%)                     | 54/117 (46.15%)        | 0.727        | 0.464-1.141        | 0.166            | ns                                     | ns                 | ns               |
| Age [years] **                   | 337  | 65 (58-75.5)                         | 74 (64-81)             | <b>1.046</b> | <b>1.026-1.068</b> | <b>&lt;0.001</b> | ns                                     | ns                 | ns               |
| BMI [kg/m <sup>2</sup> ] **      | 330  | 25.53<br>(23.44-29.30)               | 27.34<br>(23.88-30.19) | <b>1.083</b> | <b>1.030-1.139</b> | <b>0.002</b>     | <b>1.141</b>                           | <b>1.061-1.228</b> | <b>&lt;0.001</b> |
| Higher education *               | 331  | 50/217 (23.04%)                      | 14/114 (12.28%)        | <b>0.468</b> | <b>0.246-0.889</b> | <b>0.020</b>     | ns                                     | ns                 | ns               |
| Education length [years] **      | 326  | 11 (10-14)                           | 11 (8-12)              | <b>0.890</b> | <b>0.826-0.959</b> | <b>0.002</b>     | ns                                     | ns                 | ns               |
| Hemorrhagic stroke *             | 337  | 8/220 (3.64%)                        | 6/117 (5.13%)          | 1.432        | 0.485-4.231        | 0.516            | ns                                     | ns                 | ns               |
| TOAST classification             |      |                                      |                        |              |                    |                  |                                        |                    |                  |
| - 1 *                            | 297  | 16/189 (8.47%)                       | 9/108 (8.33%)          | 0.983        | 0.419-2.307        | 0.969            | ns                                     | ns                 | ns               |
| - 2 *                            | 297  | 9/189 (4.76%)                        | 6/108 (5.56%)          | 1.176        | 0.407-3.400        | 0.764            | ns                                     | ns                 | ns               |
| - 3 *                            | 297  | 53/189 (28.04%)                      | 46/108 (42.59%)        | <b>1.904</b> | <b>1.159-3.127</b> | <b>0.011</b>     | ns                                     | ns                 | ns               |
| - 4 *                            | 297  | 109/189 (57.67%)                     | 46/108 (42.59%)        | <b>0.545</b> | <b>0.338-0.878</b> | <b>0.013</b>     | ns                                     | ns                 | ns               |
| - 5 *                            | 297  | 2/189 (1.06%)                        | 1/108 (0.93%)          | 0.874        | 0.078-9.751        | 0.913            | ns                                     | ns                 | ns               |
| Side of stroke                   |      |                                      |                        |              |                    |                  |                                        |                    |                  |
| - right hemisphere *             | 337  | 78/220 (35.45%)                      | 50/117 (42.74%)        | 1.359        | 0.859-2.149        | 0.191            | ns                                     | ns                 | ns               |
| - left hemisphere *              | 337  | 105/220 (47.73%)                     | 55/117 (47.01%)        | 0.972        | 0.620-1.523        | 0.900            | ns                                     | ns                 | ns               |
| - posterior part *               | 337  | 34/220 (15.45%)                      | 11/117 (9.40%)         | 0.568        | 0.276-1.167        | 0.124            | ns                                     | ns                 | ns               |
| - multiple locations *           | 337  | 3/220 (1.36%)                        | 1/117 (0.85%)          | 0.624        | 0.064-6.062        | 0.684            | ns                                     | ns                 | ns               |
| rt-Pa treatment *                | 337  | 52/220 (23.64%)                      | 34/117 (29.06%)        | 1.323        | 0.798-2.195        | 0.277            | ns                                     | ns                 | ns               |
| Thrombectomy *                   | 337  | 12/220 (5.45%)                       | 7/117 (5.98%)          | 1.103        | 0.422-2.882        | 0.841            | ns                                     | ns                 | ns               |
| Medical history                  |      |                                      |                        |              |                    |                  |                                        |                    |                  |
| - hypertension *                 | 337  | 144/220 (65.45%)                     | 85/117 (72.65%)        | 1.402        | 0.857-2.294        | 0.179            | ns                                     | ns                 | ns               |
| - diabetes *                     | 337  | 48/220 (21.82%)                      | 39/117 (33.33%)        | <b>1.792</b> | <b>1.087-2.954</b> | <b>0.022</b>     | ns                                     | ns                 | ns               |
| - atrial fibrillation *          | 337  | 28/220 (12.73%)                      | 31/117 (26.50%)        | <b>2.472</b> | <b>1.397-4.374</b> | <b>0.002</b>     | ns                                     | ns                 | ns               |
| - myocardial infraction *        | 337  | 25/220 (11.36%)                      | 20/117 (17.09%)        | 1.608        | 0.851-3.039        | 0.143            | ns                                     | ns                 | ns               |
| - PCI or CABG *                  | 337  | 18/220 (8.18%)                       | 7/117 (5.98%)          | 0.714        | 0.289-1.763        | 0.465            | ns                                     | ns                 | ns               |
| - smoking – ever *               | 336  | 110/219 (50.23%)                     | 65/117 (55.56%)        | 1.239        | 0.789-1.944        | 0.352            | ns                                     | ns                 | ns               |
| - smoking – current *            | 336  | 64/219 (29.22%)                      | 29/117 (24.79%)        | 0.798        | 0.479-1.330        | 0.387            | ns                                     | ns                 | ns               |
| - previous stroke or TIA *       | 337  | 32/220 (14.55%)                      | 28/117 (23.93%)        | <b>1.848</b> | <b>1.049-3.257</b> | <b>0.034</b>     | ns                                     | ns                 | ns               |
| CIRS, total score **             | 337  | 7 (4-10)                             | 10 (7-13)              | <b>1.164</b> | <b>1.101-1.230</b> | <b>&lt;0.001</b> | <b>1.125</b>                           | <b>1.036-1.223</b> | <b>0.005</b>     |
| Medicines                        |      |                                      |                        |              |                    |                  |                                        |                    |                  |
| - anticholinergic risk scale *** | 304  | 0.02 $\pm$ 0.28                      | 0.24 $\pm$ 0.97        | <b>2.055</b> | <b>1.052-4.014</b> | <b>0.035</b>     | ns                                     | ns                 | ns               |
| - antidepressants *              | 277  | 4/183 (2.19%)                        | 2/94 (2.13%)           | 0.973        | 0.175-5.411        | 0.975            | ns                                     | ns                 | ns               |
| - neuroleptics *                 | 277  | 2/183 (1.09%)                        | 0/94 (0%)              | -            | -                  | -                | -                                      | -                  | -                |
| - benzodiazepines *              | 276  | 4/182 (2.20%)                        | 3/94 (3.19%)           | 1.467        | 0.321-6.695        | 0.621            | ns                                     | ns                 | ns               |
| Pneumonia *                      | 337  | 9/220 (4.09%)                        | 12/117 (10.26%)        | <b>2.679</b> | <b>1.094-6.560</b> | <b>0.031</b>     | ns                                     | ns                 | ns               |
| Urinary tract infections *       | 326  | 41/214 (19.16%)                      | 40/112 (35.71%)        | <b>2.344</b> | <b>1.401-3.924</b> | <b>0.001</b>     | ns                                     | ns                 | ns               |
| Hospital stay [days] **          | 337  | 9 (8-10)                             | 9 (8-11)               | <b>1.082</b> | <b>1.014-1.155</b> | <b>0.018</b>     | ns                                     | ns                 | ns               |
| Aphasia in hospital *            | 337  | 49/220 (22.27%)                      | 39/117 (33.33%)        | <b>1.745</b> | <b>1.060-2.873</b> | <b>0.029</b>     | ns                                     | ns                 | ns               |
| Neglect in hospital *            | 337  | 11/220 (5.00%)                       | 11/117 (9.40%)         | 1.972        | 0.828-4.696        | 0.125            | ns                                     | ns                 | ns               |
| Vision deficits in hospital *    | 337  | 39/220 (17.73%)                      | 41/117 (35.04%)        | <b>2.504</b> | <b>1.498-4.185</b> | <b>&lt;0.001</b> | ns                                     | ns                 | ns               |

|                            |     |                  |                   |              |                     |                  |              |                     |              |
|----------------------------|-----|------------------|-------------------|--------------|---------------------|------------------|--------------|---------------------|--------------|
| NIHSS at admission **      | 337 | 3 (2-6.5)        | 6 (3-11)          | <b>1.079</b> | <b>1.036-1.123</b>  | <b>&lt;0.001</b> | ns           | ns                  | ns           |
| Pre-hospital mRS **        | 337 | 0 (0-0)          | 0 (0-1)           | <b>1.794</b> | <b>1.332-2.416</b>  | <b>&lt;0.001</b> | <b>1.878</b> | <b>1.092-3.229</b>  | <b>0.023</b> |
| CRP in hospital [mg/l] **  | 326 | 3.54 (1.44-9.00) | 6.34 (2.42-19.36) | <b>1.007</b> | <b>1.000-1.014</b>  | <b>0.038</b>     | ns           | ns                  | ns           |
| NPI, total score ***       | 277 | 3.68 ± 6.79      | 4.90 ± 9.15       | 1.020        | 0.988-1.053         | 0.218            | ns           | ns                  | ns           |
| - agitation/aggression *** | 277 | 1.39 ± 3.75      | 1.55 ± 4.18       | 1.010        | 0.949-1.075         | 0.747            | ns           | ns                  | ns           |
| - mood ***                 | 277 | 1.65 ± 4.08      | 1.74 ± 3.57       | 1.006        | 0.945-1.072         | 0.849            | ns           | ns                  | ns           |
| - frontal ***              | 277 | 0.92 ± 2.31      | 1.01 ± 2.36       | 1.016        | 0.914-1.129         | 0.768            | ns           | ns                  | ns           |
| - psychosis ***            | 277 | 0.09 ± 0.58      | 0.24 ± 1.18       | 1.231        | 0.907-1.670         | 0.183            | ns           | ns                  | ns           |
| Pre-hospital IQCODE **     | 280 | 78 (78-78)       | 78 (78-82)        | <b>1.111</b> | <b>1.046-1.179</b>  | <b>&lt;0.001</b> | <b>1.090</b> | <b>1.013-1.172</b>  | <b>0.021</b> |
| Delirium in hospital *     | 337 | 15/220 (6.82%)   | 28/117 (23.93%)   | <b>4.300</b> | <b>2.190-8.442</b>  | <b>&lt;0.001</b> | <b>3.841</b> | <b>1.315-11.216</b> | <b>0.014</b> |
| Delirium type              |     |                  |                   |              |                     |                  |              |                     |              |
| - hyperactive *            | 337 | 3/220 (1.36%)    | 6/117 (5.13%)     | 3.910        | 0.960-15.930        | 0.057            | ns           | ns                  | ns           |
| - hypoactive *             | 337 | 5/220 (2.27%)    | 11/117 (9.40%)    | <b>4.462</b> | <b>1.152-13.172</b> | <b>0.007</b>     | ns           | ns                  | ns           |
| - mixed *                  | 337 | 3/220 (1.36%)    | 8/117 (6.84%)     | <b>5.309</b> | <b>1.381-20.412</b> | <b>0.015</b>     | ns           | ns                  | ns           |
| Delirium length [days] **  | 43  | 1 (1-6)          | 3 (1-6)           | 1.060        | 0.810-1.388         | 0.672            | ns           | ns                  | ns           |

\* n (%); \*\* median (IQR); \*\*\* mean ± SD; AES – Apathy Evaluation Scale; BMI – body mass index; TOAST – Trial of Org 10172 in Acute Stroke Treatment; rt-Pa – recombinant tissue plasminogen activator; PCI – percutaneous coronary interventions; CABG – coronary artery bypass graft; TIA – transient ischemic attack; CIRS – Cumulative Illness Rating Scale; NIHSS – National Institutes of Health Stroke Scale; mRS – Modified Rankin Scale; CRP – C-reactive protein; NPI – Neuropsychiatric Inventory; IQCODE - Informant Questionnaire on Cognitive Decline in the Elderly; ns – not significant

**Table S10.** Predictors of post-stroke apathy (AES score  $\geq 37$ ) at 12-month follow-up in univariate and multivariate logistic regression models

| Variable                         | Data | No apathy              | Apathy                 | Univariate logistic regression model |                    |                  | Multivariate logistic regression model |                    |              |
|----------------------------------|------|------------------------|------------------------|--------------------------------------|--------------------|------------------|----------------------------------------|--------------------|--------------|
|                                  |      |                        |                        | OR                                   | 95%CI              | P-value          | OR                                     | 95%CI              | P-value      |
| Male gender *                    | 231  | 94/174 (54.02%)        | 29/57 (50.88%)         | 0.881                                | 0.484-1.604        | 0.680            | ns                                     | ns                 | ns           |
| Age [years] **                   | 231  | 65 (56-72)             | 73 (64-79)             | <b>1.062</b>                         | <b>1.031-1.094</b> | <b>&lt;0.001</b> | <b>1.047</b>                           | <b>1.010-1.086</b> | <b>0.012</b> |
| BMI [kg/m <sup>2</sup> ] **      | 228  | 26.09<br>(24.09-30.07) | 24.69<br>(22.86-27.74) | <b>0.927</b>                         | <b>0.864-0.995</b> | <b>0.036</b>     | ns                                     | ns                 | ns           |
| Higher education *               | 229  | 43/172 (25.00%)        | 9.57 (15.79%)          | 0.563                                | 0.255-1.241        | 0.154            | ns                                     | ns                 | ns           |
| Education length [years] **      | 226  | 12 (10-15)             | 11 (10-12.5)           | <b>0.875</b>                         | <b>0.789-0.970</b> | <b>0.011</b>     | ns                                     | ns                 | ns           |
| Hemorrhagic stroke *             | 231  | 11/174 (6.32%)         | 1/57 (1.75%)           | 0.265                                | 0.033-2.096        | 0.208            | ns                                     | ns                 | ns           |
| TOAST classification             |      |                        |                        |                                      |                    |                  |                                        |                    |              |
| - 1 *                            | 195  | 16/146 (10.96%)        | 5/49 (10.20%)          | 0.923                                | 0.320-2.67         | 0.883            | ns                                     | ns                 | ns           |
| - 2 *                            | 195  | 4/146 (2.74%)          | 2/49 (4.08%)           | 1.511                                | 0.268-8.514        | 0.640            | ns                                     | ns                 | ns           |
| - 3 *                            | 195  | 41/146 (28.08%)        | 15/49 (30.61%)         | 1.130                                | 0.557-2.290        | 0.735            | ns                                     | ns                 | ns           |
| - 4 *                            | 195  | 84/146 (57.53%)        | 26/49 (53.06%)         | 0.834                                | 0.436-1.598        | 0.585            | ns                                     | ns                 | ns           |
| - 5 *                            | 195  | 1/146 (0.68%)          | 1/49 (2.04%)           | 3.021                                | 0.185-49.232       | 0.438            | ns                                     | ns                 | ns           |
| Side of stroke                   |      |                        |                        |                                      |                    |                  |                                        |                    |              |
| - right hemisphere *             | 231  | 58/174 (33.33%)        | 28/57 (49.12%)         | <b>1.931</b>                         | <b>1.052-3.545</b> | <b>0.034</b>     | <b>2.196</b>                           | <b>1.022-4.719</b> | <b>0.044</b> |
| - left hemisphere *              | 231  | 81/174 (46.55%)        | 27/57 (47.37%)         | 1.033                                | 0.568-1.881        | 0.915            | ns                                     | ns                 | ns           |
| - posterior part *               | 231  | 32/174 (18.39%)        | 2/57 (3.51%)           | <b>0.161</b>                         | <b>0.037-0.696</b> | <b>0.015</b>     | ns                                     | ns                 | ns           |
| - multiple locations *           | 231  | 3/174 (1.72%)          | 0/57 (0%)              | -                                    | -                  | -                | -                                      | -                  | -            |
| rt-Pa treatment *                | 231  | 37/174 (21.26%)        | 12/57 (21.05%)         | 0.987                                | 0.474-2.055        | 0.973            | ns                                     | ns                 | ns           |
| Thrombectomy *                   | 231  | 9/174 (5.17%)          | 4/57 (7.02%)           | 1.384                                | 0.409-4.676        | 0.601            | ns                                     | ns                 | ns           |
| Medical history                  |      |                        |                        |                                      |                    |                  |                                        |                    |              |
| - hypertension *                 | 231  | 120/174 (68.97%)       | 49/57 (85.96%)         | <b>2.756</b>                         | <b>1.222-6.217</b> | <b>0.015</b>     | ns                                     | ns                 | ns           |
| - diabetes *                     | 231  | 40/174 (22.99%)        | 20/57 (35.09%)         | 1.811                                | 0.947-3.464        | 0.073            | ns                                     | ns                 | ns           |
| - atrial fibrillation *          | 231  | 19/174 (10.92%)        | 15/57 (26.32%)         | <b>2.914</b>                         | <b>1.365-6.217</b> | <b>0.006</b>     | ns                                     | ns                 | ns           |
| - myocardial infraction *        | 231  | 24/174 (13.79%)        | 10/57 (17.54%)         | 1.330                                | 0.593-2.981        | 0.489            | ns                                     | ns                 | ns           |
| - PCI or CABG *                  | 231  | 17/174 (9.77%)         | 4/57 (7.02%)           | 0.697                                | 0.225-2.164        | 0.532            | ns                                     | ns                 | ns           |
| - smoking – ever *               | 230  | 88/174 (50.57%)        | 27/56 (48.21%)         | 0.910                                | 0.498-1.662        | 0.759            | ns                                     | ns                 | ns           |
| - smoking – current *            | 230  | 42/174 (24.14%)        | 15/56 (26.79%)         | 1.150                                | 0.579-2.283        | 0.690            | ns                                     | ns                 | ns           |
| - previous stroke or TIA *       | 230  | 23/173 (13.29%)        | 13/57 (22.81%)         | 1.927                                | 0.902-4.114        | 0.090            | ns                                     | ns                 | ns           |
| CIRS, total score **             | 231  | 7 (4-10)               | 9 (6-13)               | <b>1.137</b>                         | <b>1.057-1.222</b> | <b>&lt;0.001</b> | ns                                     | ns                 | ns           |
| Medicines                        |      |                        |                        |                                      |                    |                  |                                        |                    |              |
| - anticholinergic risk scale *** | 213  | 0.00 $\pm$ 0.00        | 0.17 $\pm$ 0.72        | -                                    | -                  | -                | -                                      | -                  | -            |
| - antidepressants *              | 190  | 0/144 (0%)             | 3/46 (6.52%)           | -                                    | -                  | -                | -                                      | -                  | -            |
| - neuroleptics *                 | 190  | 1/144 (0.69%)          | 0/46 (0%)              | -                                    | -                  | -                | -                                      | -                  | -            |
| - benzodiazepines *              | 190  | 1/144 (0.69%)          | 1/46 (2.17%)           | 3.178                                | 0.195-51.843       | 0.417            | ns                                     | ns                 | ns           |
| Pneumonia *                      | 231  | 6/174 (3.45%)          | 3/57 (5.26%)           | 1.556                                | 0.376-6.432        | 0.542            | ns                                     | ns                 | ns           |
| Urinary tract infections *       | 224  | 30/170 (17.65%)        | 10/54 (18.52%)         | 1.061                                | 0.480-2.341        | 0.884            | ns                                     | ns                 | ns           |
| Hospital stay [days] **          | 231  | 9 (8-11)               | 9 (8-10)               | 0.986                                | 0.985-1.087        | 0.780            | ns                                     | ns                 | ns           |
| Aphasia in hospital *            | 231  | 43/174 (24.71%)        | 17/57 (29.82%)         | 1.295                                | 0.667-2.515        | 0.446            | ns                                     | ns                 | ns           |
| Neglect in hospital *            | 231  | 9/174 (5.17%)          | 8/57 (14.04%)          | 2.993                                | 1.096-8.172        | 0.032            | ns                                     | ns                 | ns           |
| Vision deficits in hospital *    | 231  | 34/174 (19.54%)        | 17/57 (29.82%)         | 1.750                                | 0.887-3.454        | 0.107            | ns                                     | ns                 | ns           |

|                            |     |                   |                   |              |                     |                  |              |                     |              |
|----------------------------|-----|-------------------|-------------------|--------------|---------------------|------------------|--------------|---------------------|--------------|
| NIHSS at admission **      | 231 | 3 (1-6)           | 5 (2-10)          | 1.042        | 0.989-1.097         | 0.123            | ns           | ns                  | ns           |
| Pre-hospital mRS **        | 231 | 0 (0-0)           | 0 (0-1)           | <b>2.141</b> | <b>1.361-3.366</b>  | <b>0.001</b>     | <b>1.791</b> | <b>1.033-3.104</b>  | <b>0.038</b> |
| CRP in hospital [mg/l] **  | 224 | 2.77 (1.37-10.19) | 4.22 (1.68-14.35) | 1.002        | 0.994-1.011         | 0.632            | ns           | ns                  | ns           |
| NPI, total score ***       | 190 | 2.56 ± 5.39       | 5.46 ± 8.22       | <b>1.065</b> | <b>1.015-1.118</b>  | <b>0.011</b>     | <b>1.055</b> | <b>1.001-1.113</b>  | <b>0.046</b> |
| - agitation/aggression *** | 190 | 0.95 ± 3.17       | 2.00 ± 4.53       | 1.072        | 0.985-1.168         | 0.107            | ns           | ns                  | ns           |
| - mood ***                 | 190 | 1.26 ± 3.15       | 2.07 ± 4.61       | 1.058        | 0.972-1.150         | 0.192            | ns           | ns                  | ns           |
| - frontal ***              | 190 | 0.76 ± 2.18       | 1.17 ± 2.52       | 1.075        | 0.942-1.226         | 0.286            | ns           | ns                  | ns           |
| - psychosis ***            | 190 | 0.08 ± 0.59       | 0.17 ± 0.90       | 1.184        | 0.770-1.821         | 0.442            | ns           | ns                  | ns           |
| Pre-hospital IQCODE **     | 191 | 78 (78-78)        | 78 (78-81)        | <b>1.136</b> | <b>1.038-1.243</b>  | <b>0.006</b>     | ns           | ns                  | ns           |
| Delirium in hospital *     | 231 | 9/174 (5.17%)     | 13/57 (22.81%)    | <b>5.417</b> | <b>2.175-13.493</b> | <b>&lt;0.001</b> | <b>4.951</b> | <b>1.685-14.547</b> | <b>0.004</b> |
| Delirium type              |     |                   |                   |              |                     |                  |              |                     |              |
| - hyperactive *            | 231 | 4/174 (2.30%)     | 3/57 (5.26%)      | 2.361        | 0.512-10.882        | 0.270            | ns           | ns                  | ns           |
| - hypoactive *             | 231 | 3/174 (1.72%)     | 4/57 (7.02%)      | 4.302        | 0.933-19.834        | 0.061            | ns           | ns                  | ns           |
| - mixed *                  | 231 | 0/174 (0%)        | 2/57 (3.51%)      | -            | -                   | -                | -            | -                   | -            |
| Delirium length [days] **  | 22  | 2 (1-6)           | 3 (1-6)           | 1.024        | 0.720-1.455         | 0.896            | ns           | ns                  | ns           |

\* n (%); \*\* median (IQR); \*\*\* mean ± SD; AES – Apathy Evaluation Scale; BMI – body mass index; TOAST – Trial of Org 10172 in Acute Stroke Treatment; rt-Pa – recombinant tissue plasminogen activator; PCI – percutaneous coronary interventions; CABG – coronary artery bypass graft; TIA – transient ischemic attack; CIRS – Cumulative Illness Rating Scale; NIHSS – National Institutes of Health Stroke Scale; mRS – Modified Rankin Scale; CRP – C-reactive protein; NPI – Neuropsychiatric Inventory; IQCODE - Informant Questionnaire on Cognitive Decline in the Elderly; ns – not significant

**Table S11.** Predictors of post-stroke anxiety (STAI-S sten score  $\geq 7$ ) at 3-month follow-up in univariate and multivariate logistic regression models

| Variable                         | Data | Univariate logistic regression model |                        |              |                    |                  | Multivariate logistic regression model |                    |              |  |
|----------------------------------|------|--------------------------------------|------------------------|--------------|--------------------|------------------|----------------------------------------|--------------------|--------------|--|
|                                  |      | No anxiety                           | Anxiety                | OR           | 95%CI              | P-value          | OR                                     | 95%CI              | P-value      |  |
| Male gender *                    | 345  | 138/252 (54.76%)                     | 45/93 (48.39%)         | 0.774        | 0.481-1.247        | 0.293            | ns                                     | ns                 | ns           |  |
| Age [years] **                   | 345  | 68 (59-78)                           | 69 (63-78)             | 1.009        | 0.990-1.028        | 0.362            | ns                                     | ns                 | ns           |  |
| BMI [kg/m <sup>2</sup> ] **      | 338  | 25.75<br>(23.44-29.35)               | 27.17<br>(23.88-31.01) | <b>1.061</b> | <b>1.008-1.116</b> | <b>0.024</b>     | <b>1.087</b>                           | <b>1.019-1.159</b> | <b>0.011</b> |  |
| Higher education *               | 339  | 52/247 (21.05%)                      | 14/92 (15.22%)         | 0.673        | 0.353-1.284        | 0.230            | ns                                     | ns                 | ns           |  |
| Education length [years] **      | 332  | 11 (10-13)                           | 11 (9-13)              | 0.956        | 0.886-1.030        | 0.239            | ns                                     | ns                 | ns           |  |
| Hemorrhagic stroke *             | 345  | 13/252 (5.16%)                       | 3/93 (3.23%)           | 0.613        | 0.171-2.201        | 0.453            | ns                                     | ns                 | ns           |  |
| TOAST classification             |      |                                      |                        |              |                    |                  |                                        |                    |              |  |
| - 1 *                            | 305  | 22/220 (10.00%)                      | 9/85 (10.59%)          | 1.066        | 0.470-2.418        | 0.879            | ns                                     | ns                 | ns           |  |
| - 2 *                            | 305  | 13/220 (5.91%)                       | 6/85 (7.06%)           | 1.209        | 0.444-3.292        | 0.710            | ns                                     | ns                 | ns           |  |
| - 3 *                            | 305  | 63/220 (28.64%)                      | 34/85 (40.00%)         | 1.661        | 0.985-2.803        | 0.057            | ns                                     | ns                 | ns           |  |
| - 4 *                            | 305  | 121/220 (55.00%)                     | 34/85 (40.00%)         | <b>0.545</b> | <b>0.328-0.907</b> | <b>0.020</b>     | ns                                     | ns                 | ns           |  |
| - 5 *                            | 305  | 1/220 (0.45%)                        | 2/85 (2.35%)           | 5.277        | 0.472-58.976       | 0.177            | ns                                     | ns                 | ns           |  |
| Side of stroke                   |      |                                      |                        |              |                    |                  |                                        |                    |              |  |
| - right hemisphere *             | 345  | 89/252 (35.32%)                      | 39/93 (41.94%)         | 1.323        | 0.813-2.151        | 0.260            | ns                                     | ns                 | ns           |  |
| - left hemisphere *              | 345  | 124/252 (49.21%)                     | 46/93 (49.46%)         | 1.010        | 0.628-1.626        | 0.966            | ns                                     | ns                 | ns           |  |
| - posterior part *               | 345  | 36/252 (14.29%)                      | 7/93 (7.53%)           | 0.488        | 0.209-1.140        | 0.097            | ns                                     | ns                 | ns           |  |
| - multiple locations *           | 345  | 3/252 (1.19%)                        | 1/93 (1.08%)           | 0.902        | 0.093-8.783        | 0.929            | ns                                     | ns                 | ns           |  |
| rt-Pa treatment *                | 345  | 56/252 (22.22%)                      | 28/93 (30.11%)         | 1.508        | 0.884-2.570        | 0.131            | ns                                     | ns                 | ns           |  |
| Thrombectomy *                   | 345  | 11/252 (4.37%)                       | 8/93 (8.60%)           | 2.062        | 0.803-5.298        | 0.133            | ns                                     | ns                 | ns           |  |
| Medical history                  |      |                                      |                        |              |                    |                  |                                        |                    |              |  |
| - hypertension *                 | 345  | 172/252 (68.25%)                     | 68/93 (73.12%)         | 1.265        | 0.745-2.149        | 0.384            | ns                                     | ns                 | ns           |  |
| - diabetes *                     | 345  | 63/252 (25.00%)                      | 28/93 (30.11%)         | 1.292        | 0.763-2.189        | 0.340            | ns                                     | ns                 | ns           |  |
| - atrial fibrillation *          | 345  | 39/252 (15.48%)                      | 19/93 (20.43%)         | 1.402        | 0.763-2.578        | 0.276            | ns                                     | ns                 | ns           |  |
| - myocardial infraction *        | 345  | 33/252 (13.10%)                      | 16/93 (17.20%)         | 1.379        | 0.719-2.644        | 0.333            | ns                                     | ns                 | ns           |  |
| - PCI or CABG *                  | 345  | 22/252 (8.73%)                       | 6/93 (6.45%)           | 0.721        | 0.283-1.838        | 0.493            | ns                                     | ns                 | ns           |  |
| - smoking – ever *               | 344  | 126/251 (50.20%)                     | 57/93 (61.29%)         | 1.571        | 0.967-2.551        | 0.068            | ns                                     | ns                 | ns           |  |
| - smoking – current *            | 344  | 67/251 (26.69%)                      | 30/93 (32.26%)         | 1.308        | 0.780-2.193        | 0.309            | ns                                     | ns                 | ns           |  |
| - previous stroke or TIA *       | 345  | 38/252 (15.08%)                      | 26/93 (27.96%)         | <b>2.185</b> | <b>1.237-3.862</b> | <b>0.007</b>     | <b>2.385</b>                           | <b>1.127-5.047</b> | <b>0.023</b> |  |
| CIRS, total score **             | 345  | 7 (5-11)                             | 10 (7-13)              | <b>1.129</b> | <b>1.069-1.192</b> | <b>&lt;0.001</b> | <b>1.086</b>                           | <b>1.010-1.168</b> | <b>0.026</b> |  |
| Medicines                        |      |                                      |                        |              |                    |                  |                                        |                    |              |  |
| - anticholinergic risk scale *** | 309  | 0.06 ± 0.40                          | 0.12 ± 0.71            | 1.244        | 0.790-1.961        | 0.346            | ns                                     | ns                 | ns           |  |
| - antidepressants *              | 287  | 0/211 (0%)                           | 2/76 (2.63%)           | -            | -                  | -                | -                                      | -                  | -            |  |
| - neuroleptics *                 | 287  | 2.211 (0.95%)                        | 0/76 (0%)              | -            | -                  | -                | -                                      | -                  | -            |  |
| - benzodiazepines *              | 286  | 4/210 (1.90%)                        | 1/76 (1.32%)           | 0.687        | 0.076-6.242        | 0.739            | ns                                     | ns                 | ns           |  |
| Pneumonia *                      | 345  | 13/252 (5.16%)                       | 10/93 (10.75%)         | 2.215        | 0.936-5.242        | 0.070            | ns                                     | ns                 | ns           |  |
| Urinary tract infections *       | 333  | 53/243 (21.81%)                      | 36/90 (40.00%)         | <b>2.390</b> | <b>1.421-4.021</b> | <b>0.001</b>     | <b>2.086</b>                           | <b>1.080-4.026</b> | <b>0.029</b> |  |
| Hospital stay [days] **          | 345  | 9 (8-10)                             | 9 (8-11)               | 1.043        | 0.980-1.110        | 0.188            | ns                                     | ns                 | ns           |  |
| Aphasia in hospital *            | 345  | 66/252 (26.19%)                      | 26/93 (27.96%)         | 1.094        | 0.642-1.863        | 0.742            | ns                                     | ns                 | ns           |  |
| Neglect in hospital *            | 345  | 16/252 (6.35%)                       | 8/93 (8.60%)           | 1.388        | 0.573-3.361        | 0.467            | ns                                     | ns                 | ns           |  |
| Vision deficits in hospital *    | 345  | 60/252 (23.81%)                      | 28/93 (30.11%)         | 1.378        | 0.812-2.341        | 0.235            | ns                                     | ns                 | ns           |  |

|                            |     |                   |                   |              |                     |                  |              |                    |              |
|----------------------------|-----|-------------------|-------------------|--------------|---------------------|------------------|--------------|--------------------|--------------|
| NIHSS at admission **      | 345 | 4 (2-7)           | 5 (3-10)          | 1.040        | 0.998-1.084         | 0.064            | ns           | ns                 | ns           |
| Pre-hospital mRS **        | 345 | 0 (0-0)           | 0 (0-0)           | <b>1.330</b> | <b>1.026-1.723</b>  | <b>0.031</b>     | ns           | ns                 | ns           |
| CRP in hospital [mg/l] **  | 335 | 3.85 (1.59-10.66) | 6.60 (2.41-18.10) | 1.004        | 0.997-1.010         | 0.253            | ns           | ns                 | ns           |
| NPI, total score ***       | 287 | 3.71 ± 8.09       | 6.92 ± 9.34       | <b>1.040</b> | <b>1.010-1.071</b>  | <b>0.009</b>     | ns           | ns                 | ns           |
| - agitation/aggression *** | 287 | 1.48 ± 4.43       | 1.76 ± 3.14       | 1.016        | 0.957-1.079         | 0.607            | ns           | ns                 | ns           |
| - mood ***                 | 287 | 1.16 ± 2.73       | 1.78 ± 3.12       | 1.071        | 0.984-1.116         | 0.112            | ns           | ns                 | ns           |
| - frontal ***              | 287 | 1.29 ± 3.46       | 2.00 ± 3.46       | 1.055        | 0.984-1.131         | 0.135            | ns           | ns                 | ns           |
| - psychosis ***            | 287 | 0.13 ± 0.83       | 0.47 ± 2.32       | 1.171        | 0.959-1.429         | 0.121            | ns           | ns                 | ns           |
| Pre-hospital IQCODE **     | 290 | 78 (78-79.5)      | 78 (78-82)        | 1.028        | 0.995-1.063         | 0.095            | ns           | ns                 | ns           |
| Delirium in hospital *     | 345 | 26/252 (10.32%)   | 25/93 (26.88%)    | <b>3.196</b> | <b>1.732-5.895</b>  | <b>&lt;0.001</b> | <b>2.831</b> | <b>1.254-6.391</b> | <b>0.012</b> |
| Delirium type              |     |                   |                   |              |                     |                  |              |                    |              |
| - hyperactive *            | 345 | 4/252 (1.59%)     | 4/93 (4.30%)      | 2.787        | 0.682-11.378        | 0.153            | ns           | ns                 | ns           |
| - hypoactive *             | 345 | 11/252 (4.37%)    | 7/93 (7.53%)      | 1.783        | 0.670-4.747         | 0.247            | ns           | ns                 | ns           |
| - mixed *                  | 345 | 6/252 (2.38%)     | 10/93 (10.75%)    | <b>4.940</b> | <b>1.742-14.007</b> | <b>0.003</b>     | ns           | ns                 | ns           |
| Delirium length [days] **  | 51  | 1.5 (1-5)         | 3 (1-6)           | 1.136        | 0.898-1.438         | 0.288            | ns           | ns                 | ns           |

\* n (%); \*\* median (IQR); \*\*\* mean ± SD; STAI-S – State-Trait Anxiety Inventory, state scale; BMI – body mass index; TOAST – Trial of Org 10172 in Acute Stroke Treatment; rt-Pa – recombinant tissue plasminogen activator; PCI – percutaneous coronary interventions; CABG – coronary artery bypass graft; TIA – transient ischemic attack; CIRS – Cumulative Illness Rating Scale; NIHSS – National Institutes of Health Stroke Scale; mRS – Modified Rankin Scale; CRP – C-reactive protein; NPI – Neuropsychiatric Inventory; IQCODE - Informant Questionnaire on Cognitive Decline in the Elderly; ns – not significant



**Table S12.** Predictors of post-stroke aggression (BDHI 'Aggression' sten score  $\geq 7$ ) in hospital in univariate and multivariate logistic regression models

| Variable                         | Data | No aggression          | Aggression             | Univariate logistic regression model |                    |              | Multivariate logistic regression model |                    |              |
|----------------------------------|------|------------------------|------------------------|--------------------------------------|--------------------|--------------|----------------------------------------|--------------------|--------------|
|                                  |      |                        |                        | OR                                   | 95%CI              | P-value      | OR                                     | 95%CI              | P-value      |
| Male gender *                    | 441  | 200/403 (49.63%)       | 22/38 (57.89%)         | 1.396                                | 0.712-2.735        | 0.332        | ns                                     | ns                 | ns           |
| Age [years] **                   | 441  | 68 (60-79)             | 78 (69-84)             | 0.995                                | 0.971-1.020        | 0.689        | ns                                     | ns                 | ns           |
| BMI [kg/m <sup>2</sup> ] **      | 432  | 27.16<br>(23.88-30.47) | 26.45<br>(24.09-29.74) | 1.021                                | 0.955-1.091        | 0.544        | ns                                     | ns                 | ns           |
| Higher education *               | 436  | 84/399 (21.05%)        | 4/37 (10.81%)          | 0.455                                | 0.157-1.319        | 0.147        | ns                                     | ns                 | ns           |
| Education length [years] **      | 435  | 11 (10-13)             | 10 (8-12)              | 0.954                                | 0.858-1.061        | 0.389        | ns                                     | ns                 | ns           |
| Hemorrhagic stroke *             | 441  | 22/403 (5.46%)         | 4/38 (10.53%)          | 2.037                                | 0.664-6.255        | 0.214        | ns                                     | ns                 | ns           |
| TOAST classification             |      |                        |                        |                                      |                    |              |                                        |                    |              |
| - 1 *                            | 383  | 39/349 (11.17%)        | 7/34 (20.59%)          | 2.061                                | 0.842-5.046        | 0.114        | ns                                     | ns                 | ns           |
| - 2 *                            | 383  | 21/349 (6.02%)         | 2/34 (5.88%)           | 0.976                                | 0.219-4.354        | 0.975        | ns                                     | ns                 | ns           |
| - 3 *                            | 383  | 101/349 (28.94%)       | 12/34 (35.29%)         | 1.339                                | 0.639-2.808        | 0.439        | ns                                     | ns                 | ns           |
| - 4 *                            | 383  | 184/349 (52.72%)       | 12/34 (35.29%)         | 0.489                                | 0.235-1.019        | 0.056        | ns                                     | ns                 | ns           |
| - 5 *                            | 383  | 4/349 (1.15%)          | 1/34 (2.94%)           | 2.614                                | 0.284-24.071       | 0.396        | ns                                     | ns                 | ns           |
| Side of stroke                   |      |                        |                        |                                      |                    |              |                                        |                    |              |
| - right hemisphere *             | 441  | 172/403 (42.68%)       | 19/38 (50.00%)         | 1.343                                | 0.690-2.614        | 0.385        | ns                                     | ns                 | ns           |
| - left hemisphere *              | 441  | 168/403 (41.69%)       | 16/38 (42.11%)         | 1.017                                | 0.519-1.996        | 0.960        | ns                                     | ns                 | ns           |
| - posterior part *               | 441  | 53/403 (13.15%)        | 2/38 (5.26%)           | 0.367                                | 0.086-1.569        | 0.176        | ns                                     | ns                 | ns           |
| - multiple locations *           | 441  | 10/403 (2.48%)         | 1/38 (2.63%)           | 1.062                                | 0.132-8.529        | 0.955        | ns                                     | ns                 | ns           |
| rt-Pa treatment *                | 441  | 100/403 (24.81%)       | 5/38 (13.16%)          | 0.459                                | 0.174-1.208        | 0.115        | ns                                     | ns                 | ns           |
| Thrombectomy *                   | 441  | 18/403 (4.47%)         | 1/38 (2.63%)           | 0.578                                | 0.075-4.454        | 0.599        | ns                                     | ns                 | ns           |
| Medical history                  |      |                        |                        |                                      |                    |              |                                        |                    |              |
| - hypertension *                 | 441  | 277/403 (68.73%)       | 26/38 (68.42%)         | 0.986                                | 0.482-2.016        | 0.968        | ns                                     | ns                 | ns           |
| - diabetes *                     | 441  | 104/403 (25.81%)       | 12/38 (31.58%)         | 1.327                                | 0.646-2.725        | 0.441        | ns                                     | ns                 | ns           |
| - atrial fibrillation *          | 441  | 67/403 (16.63%)        | 10/38 (26.32%)         | 1.791                                | 0.831-3.861        | 0.137        | ns                                     | ns                 | ns           |
| - myocardial infraction *        | 441  | 55/403 (14.65%)        | 4/38 (10.53%)          | 0.744                                | 0.254-2.180        | 0.590        | ns                                     | ns                 | ns           |
| - PCI or CABG *                  | 441  | 33/403 (8.19%)         | 6/38 (15.79%)          | 2.102                                | 0.820-5.392        | 0.122        | ns                                     | ns                 | ns           |
| - smoking – ever *               | 440  | 201/402 (50.00%)       | 27/38 (71.05%)         | <b>2.455</b>                         | <b>1.185-5.082</b> | <b>0.016</b> | <b>3.088</b>                           | <b>1.333-7.154</b> | <b>0.009</b> |
| - smoking – current *            | 440  | 111/402 (27.61%)       | 16/38 (42.11%)         | 1.907                                | 0.966-3.764        | 0.063        | ns                                     | ns                 | ns           |
| - previous stroke or TIA *       | 439  | 71/401 (17.71%)        | 5/38 (13.16%)          | 0.704                                | 0.266-1.867        | 0.481        | ns                                     | ns                 | ns           |
| CIRS, total score **             | 441  | 8 (5-12)               | 10 (7-14)              | 1.027                                | 0.958-1.102        | 0.451        | ns                                     | ns                 | ns           |
| Medicines                        |      |                        |                        |                                      |                    |              |                                        |                    |              |
| - anticholinergic risk scale *** | 401  | 0.05 ± 0.35            | 0.14 ± 0.76            | 1.656                                | 0.971-2.825        | 0.064        | ns                                     | ns                 | ns           |
| - antidepressants *              | 368  | 9/333 (2.70%)          | 1/35 (2.86%)           | 1.059                                | 0.130-8.612        | 0.957        | ns                                     | ns                 | ns           |
| - neuroleptics *                 | 368  | 2/333 (0.60%)          | 0/35 (0%)              | -                                    | -                  | -            | -                                      | -                  | -            |
| - benzodiazepines *              | 367  | 5/332 (1.51%)          | 0/35 (0%)              | -                                    | -                  | -            | -                                      | -                  | -            |
| Pneumonia *                      | 441  | 18/403 (4.47%)         | 4/38 (10.53%)          | 2.516                                | 0.806-7.858        | 0.112        | ns                                     | ns                 | ns           |
| Urinary tract infections *       | 426  | 110/392 (28.06%)       | 8/34 (23.53%)          | 0.789                                | 0.347-1.795        | 0.572        | ns                                     | ns                 | ns           |
| Hospital stay [days] **          | 441  | 9 (8-11)               | 11 (8-15)              | 1.070                                | 0.999-1.146        | 0.055        | ns                                     | ns                 | ns           |
| Aphasia in hospital *            | 441  | 76/403 (18.86%)        | 8/38 (21.05%)          | 1.147                                | 0.506-2.602        | 0.742        | ns                                     | ns                 | ns           |
| Neglect in hospital *            | 441  | 42/403 (10.42%)        | 7/38 (18.42%)          | 1.941                                | 0.805-4.680        | 0.140        | ns                                     | ns                 | ns           |
| Vision deficits in hospital *    | 441  | 107/403 (26.55%)       | 13/38 (34.21%)         | 1.439                                | 0.710-2.913        | 0.313        | ns                                     | ns                 | ns           |

|                            |     |                   |                    |              |                     |                  |              |                    |                  |
|----------------------------|-----|-------------------|--------------------|--------------|---------------------|------------------|--------------|--------------------|------------------|
| NIHSS at admission **      | 441 | 4 (2-8)           | 15 (7-20)          | <b>1.070</b> | <b>1.013-1.132</b>  | <b>0.016</b>     | <b>1.141</b> | <b>1.060-1.227</b> | <b>&lt;0.001</b> |
| Pre-hospital mRS **        | 441 | 0 (0-0)           | 0 (0-2)            | 1.043        | 0.752-1.446         | 0.800            | ns           | ns                 | ns               |
| CRP in hospital [mg/l] **  | 427 | 4.41 (1.77-11.97) | 13.46 (4.53-48.56) | 1.002        | 0.994-1.010         | 0.645            | ns           | ns                 | ns               |
| NPI, total score ***       | 368 | 4.72 ± 9.36       | 5.20 ± 9.46        | 1.005        | 0.971-1.040         | 0.775            | ns           | ns                 | ns               |
| - agitation/aggression *** | 368 | 1.05 ± 3.11       | 1.57 ± 3.37        | 1.041        | 0.955-1.134         | 0.362            | ns           | ns                 | ns               |
| - mood ***                 | 368 | 1.74 ± 4.01       | 2.54 ± 5.13        | 1.038        | 0.970-1.112         | 0.279            | ns           | ns                 | ns               |
| - frontal ***              | 368 | 1.40 ± 4.05       | 1.89 ± 4.23        | 1.024        | 0.955-1.097         | 0.506            | ns           | ns                 | ns               |
| - psychosis ***            | 368 | 0.32 ± 2.03       | 0.00 ± 0.00        | -            | -                   | -                | -            | -                  | -                |
| Pre-hospital IQCODE **     | 371 | 78 (78-81)        | 78 (78-81)         | 0.992        | 0.941-1.045         | 0.756            | ns           | ns                 | ns               |
| Delirium in hospital *     | 441 | 62/403 (15.38%)   | 11/38 (28.95%)     | <b>2.241</b> | <b>1.057-4.751</b>  | <b>0.035</b>     | <b>3.391</b> | <b>1.486-7.739</b> | <b>0.004</b>     |
| Delirium type              |     |                   |                    |              |                     |                  |              |                    |                  |
| - hyperactive *            | 441 | 12/403 (2.98%)    | 2/38 (5.26%)       | 1.810        | 0.390-8.405         | 0.449            | ns           | ns                 | ns               |
| - hypoactive *             | 441 | 28/403 (6.95%)    | 1/38 (2.63%)       | 0.362        | 0.048-2.737         | 0.325            | ns           | ns                 | ns               |
| - mixed *                  | 441 | 13/403 (3.23%)    | 8/38 (21.05%)      | <b>8.000</b> | <b>3.076-20.807</b> | <b>&lt;0.001</b> | ns           | ns                 | ns               |
| Delirium length [days] **  | 73  | 2.5 (1-6)         | 4 (3-7)            | 1.202        | 0.917-1.577         | 0.183            | ns           | ns                 | ns               |

\* n (%); \*\* median (IQR); \*\*\* mean ± SD; BDHI – Buss-Durkee Hostility Inventory; ‘Aggression’ – assault, indirect hostility, irritability and verbal hostility; BMI – body mass index; TOAST – Trial of Org 10172 in Acute Stroke Treatment; rt-Pa – recombinant tissue plasminogen activator; PCI – percutaneous coronary interventions; CABG – coronary artery bypass graft; TIA – transient ischemic attack; CIRS – Cumulative Illness Rating Scale; NIHSS – National Institutes of Health Stroke Scale; mRS – Modified Rankin Scale; CRP – C-reactive protein; NPI – Neuropsychiatric Inventory; IQCODE - Informant Questionnaire on Cognitive Decline in the Elderly; ns – not significant

**Table S13.** Differences in baseline characteristics between lost to follow-up patients and retained patients at 3-month follow-up

| Variable                    | Data | Lost to follow-up<br>(43) | Retained patients<br>(572) | P-value      |
|-----------------------------|------|---------------------------|----------------------------|--------------|
| Male gender *               | 615  | 19/43 (44.19%)            | 277/572 (48.43%)           | 0.591        |
| Age [years] **              | 615  | 72 (65-84)                | 70 (61-79.5)               | <b>0.033</b> |
| Higher education *          | 589  | 10/36 (27.78%)            | 99/553 (17.90%)            | 0.139        |
| Education length [years] ** | 572  | 10 (8-16)                 | 11 (9-13)                  | 0.410        |
| Hemorrhagic stroke *        | 615  | 4/43 (9.30%)              | 33/572 (5.77%)             | 0.544        |
| rt-Pa treatment *           | 615  | 6/43 (13.95%)             | 146/572 (25.52%)           | 0.130        |
| Thrombectomy *              | 615  | 0/43 (0%)                 | 28/572 (4.90%)             | 0.269        |
| Previous stroke or TIA *    | 613  | 9/43 (20.93%)             | 106/570 (18.60%)           | 0.861        |
| CIRS, total score **        | 615  | 9 (5-13)                  | 9 (5-12)                   | 0.228        |
| NIHSS at admission **       | 615  | 7 (1-16)                  | 5 (2-11)                   | 0.373        |
| Pre-hospital mRS **         | 615  | 0 (0-2)                   | 0 (0-0)                    | <b>0.031</b> |
| NPI, total score ***        | 509  | 9.86 ± 4.85               | 6.83 ± 12.08               | 0.242        |
| Pre-hospital IQCODE **      | 512  | 79 (78-95)                | 78 (78-82)                 | <b>0.038</b> |
| Delirium in hospital *      | 615  | 11/43 (25.58%)            | 114/572 (19.93%)           | 0.374        |
| Delirium type               |      |                           |                            |              |
| - hyperactive *             | 615  | 3/43 (6.98%)              | 21/572 (3.67%)             | 0.502        |
| - hypoactive *              | 615  | 2/43 (4.65%)              | 43/572 (7.52%)             | 0.695        |
| - mixed *                   | 615  | 6/43 (13.95%)             | 40/572 (6.99%)             | 0.170        |
| Delirium length [days] **   | 125  | 4 (2-7)                   | 3 (2-7)                    | 0.294        |

\* n (%); \*\* median (IQR); \*\*\* mean ± SD; BMI – body mass index; rt-Pa – recombinant tissue plasminogen activator; TIA – transient ischemic attack; CIRS – Cumulative Illness Rating Scale; NIHSS – National Institutes of Health Stroke Scale; mRS – Modified Rankin Scale; NPI – Neuropsychiatric Inventory; IQCODE - Informant Questionnaire on Cognitive Decline in the Elderly

**Table S14.** Differences in baseline characteristics between lost to follow-up patients and retained patients at 12-month follow-up

| Variable                    | Data | Lost to follow-up<br>(78) | Retained patients<br>(482) | P-value          |
|-----------------------------|------|---------------------------|----------------------------|------------------|
| Male gender *               | 560  | 37/78 (47.44%)            | 237 (49.17%)               | 0.776            |
| Age [years] **              | 560  | 71.5 (64-83)              | 69 (60-79)                 | <b>0.013</b>     |
| Higher education *          | 539  | 14/69 (20.29%)            | 92/470 (19.57%)            | 0.889            |
| Education length [years] ** | 528  | 10 (8-14)                 | 11 (10-13)                 | 0.123            |
| Hemorrhagic stroke *        | 560  | 7/78 (8.97%)              | 25/482 (5.19%)             | 0.283            |
| rt-Pa treatment *           | 560  | 20/78 (25.64%)            | 116/482 (24.07%)           | 0.764            |
| Thrombectomy *              | 560  | 2/78 (2.56%)              | 26/482 (5.39%)             | 0.433            |
| Previous stroke or TIA *    | 558  | 15/78 (19.23%)            | 89/480 (18.54%)            | 0.885            |
| CIRS, total score **        | 560  | 9 (5-13)                  | 8 (5-12)                   | 0.291            |
| NIHSS at admission **       | 560  | 6 (3-14)                  | 4 (2-9)                    | <b>0.043</b>     |
| Pre-hospital mRS **         | 560  | 0 (0-1)                   | 0 (0-0)                    | <b>0.040</b>     |
| NPI, total score ***        | 460  | 9.21 ± 12.61              | 6.44 ± 12.19               | 0.111            |
| Pre-hospital IQCODE **      | 463  | 78 (78-87)                | 78 (78-81)                 | 0.131            |
| Delirium in hospital *      | 560  | 23/78 (29.49%)            | 79/482 (16.39%)            | <b>0.005</b>     |
| Delirium type               |      |                           |                            |                  |
| - hyperactive *             | 560  | 4/78 (5.13%)              | 16/482 (3.32%)             | 0.639            |
| - hypoactive *              | 560  | 7/78 (8.97%)              | 30/482 (6.22%)             | 0.508            |
| - mixed *                   | 560  | 12/78 (15.38%)            | 25/482 (5.19%)             | <b>&lt;0.001</b> |
| Delirium length [days] **   | 102  | 3 (2-7)                   | 3 (1-7)                    | 0.870            |

\* n (%); \*\* median (IQR); \*\*\* mean ± SD; BMI – body mass index; rt-Pa – recombinant tissue plasminogen activator; TIA – transient ischemic attack; CIRS – Cumulative Illness Rating Scale; NIHSS – National Institutes of Health Stroke Scale; mRS – Modified Rankin Scale; NPI – Neuropsychiatric Inventory; IQCODE - Informant Questionnaire on Cognitive Decline in the Elderly
